# Supplementary material
Source: PubMed Central journal article supplement (PMC1214546)
Supplement: nar_33_16_5156__1.pdf [file nar_33_16_5156__1.pdf]

Table s1, Zhengchang Su, et al

Table s1. Training data sets A1 and B1 obtained by phylogenetic footprinting

| Genome        | Recovered rank <sup>1</sup> | Transcription unit             | Name             | NtcA binding site <sup>2</sup> | Downstream of NtcA binding site and -10 like box <sup>3</sup> | NtcA site position <sup>4</sup> |
|---------------|-----------------------------|--------------------------------|------------------|--------------------------------|---------------------------------------------------------------|---------------------------------|
| PCC7421       | 9                           | <i>gvip212</i>                 | <i>nirA</i>      | GTAtctggggTAC                  | GTAAGTAAAGTTCCTTCAAAGCATTTCGTGG                               | -131                            |
| PCC7120       | 2                           | <i>alr0607</i>                 | <i>nirA</i>      | <b>GTAgctacttaTAC</b>          | TATTTTACCTGAGATCCCACATAACCTTAG                                | -498                            |
| MIT9313       | 5                           | <i>pmt2239</i>                 | <i>nirA</i>      | GTTcaatctgaTAC                 | CGCCAATACCTCTTCCATCAGGCT <b>TAATGA</b>                        | -470                            |
| PCC6301       | 7                           | <i>syc0310_d</i>               | <i>nirA</i>      | GTAgcaattgcTAC                 | TAAAACTGCGATCGCTGCT <b>GAAAT</b> GAGCTG                       | -207                            |
| WH8102        | 9                           | <i>synw2477</i>                | <i>nirA</i>      | GTAattccatcAAC                 | AGAACAACCTTTTGAGTACGA <b>ACTAGAAA</b> AGG                     | -349                            |
| PCC6803       | 4                           | <i>slr0898</i>                 | <i>nirA</i>      | GTAatttacgtTAC                 | AAATTTAACGAAACGGGA <b>ACCCTATAT</b> TGA                       | -61                             |
| Thermosynecho | 2                           | <i>tlr1349</i>                 | <i>nirA</i>      | GTAgcaaaattTAC                 | AAATGTTATGATTTCATCTGGCT <b>TAAAT</b> TGGA                     | -69                             |
| PCC7421       | 10                          | <i>gvip021</i>                 | <i>glnB</i>      | GTGtgaacttTAC                  | CCTCGTCGGGGAGCAATCGCT <b>TAGCGG</b> TGGCT                     | -142                            |
| PCC7120       | 22                          | <i>all2319</i>                 | <i>glnB</i>      | GTTacacagacTAC                 | ATCGAAAGTTTTGCGGAAAA <b>TAGCAT</b> TTTG                       | -199                            |
| CCMP1375      | 3                           | <i>pro1615 pro1616</i>         | - <i>glnB</i>    | GTAtcatcaatTAC                 | AAACATTATTTCTCGCTAGAGGCGCT <b>TAATAG</b> G                    | -52                             |
| MED4          | 27                          | <i>pmm1462 pmm1463</i>         | - <i>glnB</i>    | GTAtcaatgatAAC                 | AATCTTAGTATCGTTAAAAGGGTT <b>TATAT</b> GT                      | -52                             |
| MIT9313       | 10                          | <i>pmt1480 pmt1481</i>         | - <i>glnB</i>    | GTAacaacagcCAC                 | AACCCAGGCCCGTTGAAAAAGCC <b>CTAAT</b> GGG                      | -32                             |
| PCC6301       | 9                           | <i>syc1192_d</i>               | <i>glnB</i>      | GTAgcagtaacTAC                 | AACTGTGGTCTAGTCAGCGGT <b>TACCAA</b> AG                        | -90                             |
| WH8102        | 16                          | <i>synw0462</i>                | <i>glnB</i>      | GTTacaggggcTAC                 | CCACACCGCCACCATT <b>CACGTCATG</b> CTTAAT                      | -51                             |
| PCC6803       | 8                           | <i>ssl0707</i>                 | <i>glnB</i>      | <b>GTActgattttTAC</b>          | AAAAAACTTTTGAGACAATGT <b>TAAAAG</b> TG                        | -169                            |
| Thermosynecho | 8                           | <i>tlI0590 tlI0591</i>         | <i>aroE glnB</i> | GTAgctattgcTAC                 | ACGTATACTCTTTTGCCAATCT <b>TAATA</b> TAA                       | -65                             |
| PCC7421       | 1                           | <i>gvip146</i>                 | <i>glnA</i>      | GTAtctcagacTAC                 | AAAACACCTCCCCGACCTCT <b>TAGTAT</b> GGG                        | -103                            |
| PCC7120       | 1                           | <i>alr2328</i>                 | <i>glnA</i>      | <b>GTAacaaagacTAC</b>          | AAAAGTGTCTAATGTTTAGAAT <b>CTACG</b> ATAT                      | -129                            |
| CCMP1375      | 2                           | <i>pro1038</i>                 | <i>glnA</i>      | GTActtattgaTAC                 | AAAATAAGTTTGCTACGGTAAT <b>TAATTT</b> TAT                      | -56                             |
| MED4          | 2                           | <i>pmm0920</i>                 | <i>glnA</i>      | GTTacctttgaTAC                 | ATAATTAGATTCTCAAGTTAT <b>TAATTT</b> TAT                       | -52                             |
| MIT9313       | 2                           | <i>pmt0601</i>                 | <i>glnA</i>      | GTAcctggtgcTAC                 | AAAAAGGGGCCATGCGGCTGAT <b>TACGGT</b> CG                       | -66                             |
| WH8102        | 2                           | <i>synw1073</i>                | <i>glnA</i>      | GTGgcggttgaTAC                 | AAAACAGGGCATAACCGCTCT <b>TACGGT</b> CGT                       | -60                             |
| PCC6803       | 2                           | <i>slr1756</i>                 | <i>glnA</i>      | <b>GTAgcgaaaaaTAC</b>          | ATTTTCTAACTACTTGACTCT <b>TACGAT</b> GGA                       | -85                             |
| PCC7421       | 8                           | <i>gvip454</i>                 | <i>ntcA</i>      | GTAgtcctaaTAC                  | AAAAAAATGTCAGGGCTCGGCT <b>TAATTT</b> GTTA                     | -62                             |
| PCC7120       | 23                          | <i>alr4392</i>                 | <i>ntcA</i>      | GTAtaggaagTAC                  | AGAAAGGTTAACGGTGCT <b>TATTGAT</b> TTTTTC                      | -98                             |
| CCMP1375      | 6                           | <i>pro0277</i>                 | <i>ntcA</i>      | GTCatttttgaTAC                 | AAGAGGTTTTAGCTTCACTCT <b>TATCTG</b> CTCCT                     | -50                             |
| MED4          | 3                           | <i>pmm0246</i>                 | <i>ntcA</i>      | GTTactggttgaTAC                | AAGTTATTTCTTGCTGCTCT <b>TAAGT</b> TTTT                        | -50                             |
| MIT9313       | 3                           | <i>pmt1831</i>                 | <i>ntcA</i>      | GTCaccattgcTAC                 | ATGGTAGTGGAGGTCCACTCC <b>CTAACT</b> TCAT                      | -123                            |
| PCC6301       | 10                          | <i>syc1377_c</i>               | <i>ntcA</i>      | GTAgcagttgcTAC                 | AAGCAGCAGCTAGGCTAGGCC <b>TACGGT</b> AAC                       | -142                            |
| CCMP1375      | 4                           | <i>pro0295</i>                 | <i>amt1</i>      | GTAttaatgatTAC                 | CAGATAGCAACTCTATTT <b>TACCCAT</b> TTTGT                       | -89                             |
| MED4          | 11                          | <i>pmm0263</i>                 | <i>amt1</i>      | GTAtaaacgacTAC                 | TAGACATACATAAGTTTT <b>CTGAGC</b> AAAATTA                      | -85                             |
| MIT9313       | 28                          | <i>pmt1853</i>                 | <i>amt1</i>      | GTAacaaaatgAAC                 | TTTCAACCCCGCAAATAGAC <b>CTAAAAG</b> CGTC                      | -147                            |
| PCC6301       | 35                          | <i>syc1076_c</i>               | <i>amt1</i>      | GTTacatcgatTAC                 | AAAACAACCTTGAGTCTCGCT <b>GAATG</b> CTTAC                      | -112                            |
| WH8102        | 10                          | <i>synw0253</i>                | <i>amt1</i>      | GTTcagtcggaTAC                 | ACCATCCGGCGTGACCAGCAGCT <b>CTGCACT</b> C                      | -37                             |
| PCC6803       | 9                           | <i>slI0108</i>                 | <i>amt1</i>      | <b>GTAgtaaatacaTAC</b>         | AGAAAAAATCATGTAATAAT <b>TGAATACT</b> CT                       | -174                            |
| Thermosynecho | 9                           | <i>tlI1985</i>                 | <i>amt1</i>      | GTAtaacgtgaTAC                 | AGATTTTCCAATCTGAGA <b>ACTGGTGA</b> CAATCA                     | -175                            |
| PCC7120       | 15                          | <i>all1951</i>                 | <i>urt1</i>      | <b>GTAtcaaaaatAAC</b>          | AATTCAAATGGTTAAATATCAA <b>CTAATAT</b> CA                      | -101                            |
| MED4          | 4                           | <i>pmm0970</i>                 | <i>urtA</i>      | GTTacctatgcTAC                 | AAAATAAATCCCACTCGTTT <b>TAACTTT</b> TAA                       | -48                             |
| MIT9313       | 1                           | <i>pmt2229</i>                 | <i>urtA</i>      | GTAtcattcacTAC                 | AGAATCATGCCTGGCTGATCT <b>TACGTT</b> CCC                       | -80                             |
| WH8102        | 1                           | <i>synw2442</i>                | <i>urtA1</i>     | GTTccggttgaTAC                 | CAAAGCGGTGGGGGCCCTTT <b>TACCTT</b> CC                         | -52                             |
| PCC6803       | 3                           | <i>slr0447</i>                 | <i>urtA</i>      | GTAtcctatgcTAC                 | ATAATTTTTTCTTAACTACTCG <b>TAGTAT</b> GG                       | -198                            |
| Thermosynecho | 3                           | <i>tlr1120</i>                 | <i>urt1</i>      | GTAgcctagcaTAC                 | AGTTTGCCCAATAACCTCT <b>CTTAAGCT</b> TAT                       | -68                             |
| PCC7120       | 1888                        | <i>alr2817</i>                 | <i>hetC</i>      | <b>GTAacatgagaTAC</b>          | ACAATAGCATTATATTTGCT <b>TAGTAT</b> CTC                        | -607                            |
| PCC7120       | 84                          | <i>alr3710 alr3711</i>         | <i>devB devC</i> | <b>GTAcagtctgtTAC</b>          | CTTTACCTGAAACAGATGAAT <b>TAGAA</b> TFTA                       | -738                            |
| PCC7421       | 3                           | <i>gvip213 glr1559</i>         | <i>ntcB</i>      | GTAaccccagaTAC                 | ATTCGTGGCCGTGCGGGCCG <b>GATAGGT</b> CTG                       | -33                             |
| PCC7120       | 6                           | <i>all0602</i>                 | <i>ntcB</i>      | <b>GTAacaaaatcTAC</b>          | CAAATTTGGGAGCAAAATCAG <b>CTAACT</b> TAAT                      | -65                             |
| PCC6301       | 15                          | <i>syc0308_c syc0309_c</i>     | <i>ntcB nirB</i> | GTAacagaaacTAC                 | AACTTTTGTAAATCATGCAT <b>GTTCTG</b> CAAG                       | -207                            |
| Thermosynecho | 14                          | <i>tlI1357 tlI1358 tlI1359</i> | -- <i>ntcB</i>   | GTAtcaatcaaCAC                 | ACTTTACCATGGGAAAGTTGCAT <b>TAGAT</b> TGAA                     | -107                            |
| PCC7120       | 739                         | <i>alr1827</i>                 | <i>icd</i>       | GTAgaggcgaAAC                  | AACAAAAATCCTAATCCCAG <b>TACCCA</b> ATC                        | -84                             |
| PCC6803       | 12                          | <i>slI1689</i>                 | <i>rpoD</i>      | <b>GTAtcacgaatTAC</b>          | ACTGCCGTGAAAAATTAACGAT <b>TATTTT</b> GGAC                     | -296                            |
| PCC7120       | 5                           | <i>alr4249</i>                 | <i>sigF</i>      | GTAattcaaaaTAC                 | TTTTATTAGTTATGACTTGAT <b>TAAGTT</b> TCC                       | -685                            |

<sup>1</sup> The rank recovered by the scanning process ; <sup>2</sup> bold, experimentally verified binding sites; <sup>3</sup> bold, -10 like boxes; <sup>4</sup> start from the first codon.

Table s2. Training data sets A2 and B2 collected from literatures

| Genome  | Transcription     |                                | -10 like box  |
|---------|-------------------|--------------------------------|---------------|
|         | unit              | NtcA binding site <sup>1</sup> |               |
| WH7803  | <i>ntcA</i>       | GTGtgcggttgcTAC                | TAATTT        |
| WH8103  | <i>nrtP</i>       | GTAgcaattccAAC                 | TAAACT        |
| WH8103  | <i>nirA</i>       | GTAattccatcAAC                 | TAGAAA        |
| PCC7942 | <i>nir_operon</i> | GTAgtttctgtTAC                 | TAATCT        |
| PCC7942 | <i>nirB-ntcB</i>  | GTAgcaattgcTAC                 | TTAGGT        |
| PCC7942 | <i>ntcA</i>       | GTAgcagttgaTAC                 | TACGGT        |
| PCC7942 | <i>glnB</i>       | GTAgaagtaacTAC                 | TACCAA        |
| PCC7942 | <i>glnA</i>       | GTAtcagctgtTAC                 | TAGGAT        |
| PCC7942 | <i>amit1</i>      | GTTacatcgatTAC                 | AATGCT        |
| PCC7601 | <i>glnA</i>       | GTAacaaagactTAC                | TAGGAT        |
| PCC6903 | <i>glnN</i>       | GTGcgcgtttaTAC                 | TATCTT        |
| PCC7002 | <i>nrtP</i>       | GTAtcagcgggtTAC                | TTCTTT        |
| PCC6803 | <i>icd -</i>      | <b>GTAacagccaaTGC</b>          | <i>TATGAT</i> |

<sup>1</sup> Bold: this site together with those in Table s1 is used to compute prediction sensitivity.

Table s3, Zhengchang Su, et al

Table s3. Predicted NtcA promoters in CCMP1375

| Rank | Transcription unit             | Name               | NtcA site       | Downstream of NtcA binding site<br>and -10 like box <sup>1</sup> | NtcA site<br>position | Score    |
|------|--------------------------------|--------------------|-----------------|------------------------------------------------------------------|-----------------------|----------|
| 1    | <i>pro0731</i>                 | -                  | GTGgttttttaTAC  | AGTATTTTCAGAGATTATGGAATTT <b>TAATGTT</b>                         | -50                   | 15.61912 |
| 2    | <i>pro1038</i>                 | <i>glnA</i>        | GTActtattgaTAC  | AAAATAAGTTTGCTACGGTAAT <b>TAATTTTAT</b>                          | -56                   | 14.43201 |
| 3    | <i>pro1615 pro1616</i>         | - <i>glnB</i>      | GTAtcatcaatTAC  | AAACATTATTCTCGCTAGAGGCGCT <b>TAATAGG</b>                         | -52                   | 13.95702 |
| 4    | <i>pro0295</i>                 | <i>amt1</i>        | GTAttaatgattTAC | CAGATAGCAACTCTATTT <b>TACCCATATTTGT</b>                          | -89                   | 13.39198 |
| 5    | <i>pro0658</i>                 | -                  | GTTtgtgcaagtTAC | ACTTAATAAATAGCTAACT <b>TATGATTAAATCA</b>                         | -51                   | 13.30912 |
| 6    | <i>pro0277</i>                 | <i>ntcA</i>        | GTCatttttgaTAC  | AAGAGGTTTTAGCTTCACTTCT <b>TATCGTCCT</b>                          | -50                   | 13.16134 |
| 7    | <i>pro1761</i>                 | -                  | GTAcctctcgaTAC  | TGCTGGTGCGCTCTTACCGCACCT <b>TTGCACC</b>                          | -407                  | 13.15936 |
| 8    | <i>pro0892</i>                 | <i>pcbG</i>        | GTCacctttttTAC  | AGCAGATAGTAGCGATCGTA <b>TAACAGTTTCAA</b>                         | -108                  | 12.97992 |
| 9    | <i>pro1527</i>                 | <i>kch</i>         | GTAtaaataaccTAC | ATATTTCCACAATGAAGACT <b>TTGTTTGACAGAT</b>                        | -198                  | 12.91811 |
| 10   | <i>pro1762</i>                 | <i>mrc</i>         | GTAtcgagaggTAC  | TGGCTTGGTAAACCCCGG <b>TTGGGTGCAAGGC</b>                          | -218                  | 12.90905 |
| 11   | <i>pro0398 pro0399</i>         | <i>lipB fAA1</i>   | GTAttacaccaTAC  | CCTCCATTTTTTCTTCTATAAA <b>TAACCTGCA</b>                          | -587                  | 12.85354 |
| 12   | <i>pro0839</i>                 | <i>rpe</i>         | GTGgaaggaatTAC  | CTTTCTAGTTGCACCTTCAATTA <b>TAGAATC</b>                           | -53                   | 12.81605 |
| 13   | <i>pro0737</i>                 | -                  | GTAacagacattTAC | TTAAACTGTATACGGGACT <b>ACTGCTTTTATTC</b>                         | -79                   | 12.74994 |
| 14   | <i>pro1317</i>                 | -                  | GTAatctcattTAC  | ATCTAATAAATAATAATAATTT <b>TACTATTAT</b>                          | -181                  | 12.69293 |
| 15   | <i>pro0811 pro0812</i>         | --                 | GTCattagtaatTAC | CAATACACCTCAATGCAC <b>TAACACCATTAGC</b>                          | -229                  | 12.66551 |
| 16   | <i>pro0020 pro0021 pro0022</i> | - <i>murB murC</i> | GTCaatgatccTAC  | AGAAAAGTGGCGCAATAA <b>CTAAATTTTTTGA</b>                          | -139                  | 12.56876 |
| 17   | <i>pro1446</i>                 | -                  | GTAatttttttTAC  | AGCACAAACCATTGATTATTA <b>TACATTATT</b>                           | -91                   | 12.55323 |
| 18   | <i>pro1614</i>                 | -                  | GTAatgatgaTAC   | ATATTTGTGGTTTTAGTTTT <b>TAATTTCTCTAA</b>                         | -129                  | 12.50052 |
| 19   | <i>pro1462 pro1463</i>         | <i>gloB</i> -      | GTAAAatcaaaTTC  | ATCTTGCTCCCTTTCAGCTCTT <b>TAAAGTAA</b>                           | -46                   | 12.37224 |
| 20   | <i>pro1488 pro1489</i>         | --                 | GTGactgagcaAAC  | TAATTAATTTCTGTTGAGATA <b>TAATCCCTACAT</b>                        | -136                  | 12.37189 |
| 21   | <i>pro0197 pro0198</i>         | <i>ndhH fcbC</i>   | GTtaatagctaTAC  | GCAATGCTTGAAAAGTTCT <b>TAGTTGCAGGATG</b>                         | -701                  | 12.35928 |
| 22   | <i>pro0334</i>                 | <i>pcnB</i>        | GTTgaggaaatTAC  | TTTTTAAAATGATCGAAGAACA <b>CCATCTTT</b>                           | -40                   | 12.32315 |
| 23   | <i>pro1453</i>                 | -                  | GTAtaaaatatTAC  | TAAATATAGTTGCAATCAAT <b>TGCCCTGATTA</b>                          | -542                  | 12.28661 |
| 24   | <i>pro0783</i>                 | <i>pcbA</i>        | GTTtatttttaTAC  | TTTCAGGTTCTAATTGAT <b>GTAGAAAATTATC</b>                          | -561                  | 12.18944 |
| 25   | <i>pro1037</i>                 | -                  | GTAtcaataagtTAC | TTTTTGTGACTATTGGCCTCCAT <b>TTCCATT</b>                           | -170                  | 12.18029 |

<sup>1</sup> Bold, -10 like boxes

Table s4, Zhengchang Su, et al

Table s4. Predicted NtcA promoters in PCC7421

| Rank | Transcription unit                                               | Name                                        | NtcA site       | Downstream of NtcA binding site<br>and -10 like box <sup>1</sup> | NtcA site<br>position | Score    |
|------|------------------------------------------------------------------|---------------------------------------------|-----------------|------------------------------------------------------------------|-----------------------|----------|
| 1    | <i>gvip146</i>                                                   | <i>glnA</i>                                 | GTAtctcagacTAC  | AAACACCTCCCCGACCTCCT <b>TAGTAT</b> GGG                           | -103                  | 14.53822 |
| 2    | <i>gll2499 gll2500 gll2501</i>                                   | - - -                                       | GTAgTccccggcTAC | AAACTGCGCGAATCGTAATCGT <b>ATACCAGT</b>                           | -49                   | 14.20753 |
| 3    | <i>gvip213 glr1559</i>                                           | <i>ntcB</i> -                               | GTAcccccagaTAC  | ATTCTGGCCGTGCGGGCCGG <b>ATATGGT</b> CTG                          | -33                   | 14.10536 |
| 4    | <i>glr3061</i>                                                   | <i>amt1</i>                                 | GTAgTcattgaTAC  | AAATGAGTCGCGACAGATTCCGCT <b>TAAC</b> TCTC                        | -88                   | 13.75101 |
| 5    | <i>glr2690 glr2691</i>                                           | - -                                         | GGAgcggcggaTAC  | GGCGGTTCTTGCGGACTGT <b>TAACCT</b> GAGGGC                         | -57                   | 13.64837 |
| 6    | <i>glr2602</i>                                                   | -                                           | GTTtattacgcTAC  | ATTTAATTGGGGAGCGATT <b>TATAAT</b> GGGTC                          | -57                   | 13.63074 |
| 7    | <i>glr0369</i>                                                   | -                                           | GTAgTtacggcTAC  | TCCTGATTGAGCAGCAGTT <b>TATCTT</b> TATACCC                        | -323                  | 13.56199 |
| 8    | <i>gvip454</i>                                                   | <i>ntcA</i>                                 | GTAgTccctaaTAC  | AAAAAATTGCAGGGCTCGGCT <b>TAATTG</b> TTA                          | -62                   | 13.30728 |
| 9    | <i>gvip212</i>                                                   | <i>nirA</i>                                 | GTAtctggggtTAC  | GTAAGTTAAGTTCCCTCAAAGCATT <b>TCGTGG</b>                          | -131                  | 13.22382 |
| 10   | <i>gvip021</i>                                                   | <i>glnB</i>                                 | GTGtgcaacttTAC  | CCTCGTCGGGGAGCAATCGCT <b>TAGCGG</b> TGGCT                        | -142                  | 12.93903 |
| 11   | <i>gll1330</i>                                                   | -                                           | GTAgTgaggatGAC  | GTCGGTGACGGCCACACGCCCGT <b>TAGAACA</b> C                         | -419                  | 12.8756  |
| 12   | <i>gll1734 gll1735</i>                                           | - -                                         | GTActtttctgTAC  | TTTTAGTCATTGTCTGAAAACCT <b>TATGCT</b> AGG                        | -268                  | 12.70844 |
| 13   | <i>gll2867</i>                                                   | -                                           | GTGgagccgacTAC  | TATCGTTGCGCAGGGAAG <b>TATTTT</b> CGCTGTA                         | -585                  | 12.69388 |
| 14   | <i>gll1254 gll1255 gsl1256</i>                                   | - - -                                       | GTAgcagttttTAC  | CATTTTAAACAATGATTTGCT <b>TCCCGG</b> TACA                         | -36                   | 12.47082 |
| 15   | <i>glr1973 glr1974 glr1975</i>                                   | - - -                                       | GTaatcctgaaCAC  | TCAACCATTGCTTTTCAAACACT <b>TTACAAA</b>                           | -373                  | 12.44562 |
| 16   | <i>glr3270</i>                                                   | -                                           | GTAcacgtatcTAC  | GCCGATTTTTTGGGGAGACTGAT <b>TATTTCTT</b>                          | -216                  | 12.44111 |
| 17   | <i>gll4013</i>                                                   | -                                           | GTTccagacatTAC  | AATGGCGGCAATCCAGAG <b>TGGGGAG</b> CGTAC                          | -32                   | 12.40925 |
| 18   | <i>glr0200</i>                                                   | -                                           | GTGacgaagtTAC   | ATCCAAGCTTCCAGATGCGT <b>TACAGT</b> GTGAA                         | -294                  | 12.38995 |
| 19   | <i>gll1907</i>                                                   | -                                           | GTGtcatcggcTAC  | CAAAGTTAGTTTTTCAGCTGCCCG <b>TAAAACG</b>                          | -105                  | 12.33962 |
| 20   | <i>gll0937</i>                                                   | -                                           | GTGagctaaaaTAC  | ACGGCAAAGTTTGAGACCG <b>TATATT</b> CTCAT                          | -132                  | 12.33636 |
| 21   | <i>gll1029</i>                                                   | -                                           | GTAgcaaaagacTAC | GCGCGTGTTCACCAATGTAGG <b>TAACGAC</b> CCC                         | -610                  | 12.325   |
| 22   | <i>gvip214 gvip215 gvip216</i><br><i>gvip217 gvip218 glr1572</i> | <i>nrtA nrtB nrtC</i><br><i>nrtD narB</i> - | GTAtcagaaaaCAC  | GATTAGCCCGGTTACAGCGT <b>TTTCTCT</b> GAT                          | -64                   | 12.30207 |
| 23   | <i>glr1552</i>                                                   | -                                           | GTGtcgcacgaTAC  | GACTTCCGCATCTTTTCGCGAGCAT <b>TAATTCA</b>                         | -236                  | 12.23584 |
| 24   | <i>glr2112</i>                                                   | -                                           | GTAgcgtaaagcTAC | GGATTCTTGTTTTGTGT <b>TATCTT</b> TAGATA                           | -107                  | 12.19255 |
| 25   | <i>gll0158</i>                                                   | -                                           | GTTgtatgagtTAT  | AGCGGTGGCCCGTGAAAAAT <b>TAACCC</b> CAT                           | -31                   | 12.1132  |
| 26   | <i>gll2294 gvip312</i>                                           | - <i>petH</i>                               | GTGgcatggtTAC   | TTTCTTTGCTATCTATAG <b>TAAGGT</b> AAAAATA                         | -218                  | 12.04155 |
| 27   | <i>gll2225 gll2226</i>                                           | - -                                         | GTAgcgttgccTAC  | GATGAACACAGTTTGTGATGG <b>TAGCTGG</b> CG                          | -224                  | 12.03374 |
| 28   | <i>glr0398</i>                                                   | -                                           | GTcggcgccgGAC   | GGCGACTGGCTGCGCTTTCG <b>GTAGGGG</b> GGA                          | -86                   | 12.03244 |
| 29   | <i>gll3955</i>                                                   | -                                           | GACggatcgccTAC  | CGGCACCATGGTCTCGTCATG <b>CTTGGAT</b> GTA                         | -146                  | 12.00524 |
| 30   | <i>gll0878</i>                                                   | -                                           | GTTagtttcggTAC  | AGCTTGGGAAAACCCACTGCGT <b>TGAGTT</b> GTC                         | -105                  | 11.99292 |
| 31   | <i>gll0368</i>                                                   | -                                           | GTAAgtatcaaTAC  | GAAGGCAAACACCAGGATGAACGCAT <b>TGAAA</b>                          | -176                  | 11.95922 |
| 32   | <i>gll1655</i>                                                   | -                                           | GTAAagcggcccTAC | CTGATTGCTCTGATTGTACAG <b>TAAGCCC</b> CAGG                        | -168                  | 11.90786 |
| 33   | <i>glr1664 glr1665</i>                                           | - -                                         | GTGtccccagaTAC  | GTTCGATCGATTGCGGAAGC <b>TACAATAT</b> GG                          | -58                   | 11.89084 |
| 34   | <i>glr0719</i>                                                   | -                                           | GTAgcttctcccTAC | TGCGATCCATTTGAGAACT <b>TAACCTG</b> AGGGGT                        | -64                   | 11.87019 |
| 35   | <i>gvip453</i>                                                   | <i>purA</i>                                 | GTGttctcccTAC   | CGCCCTGGAGCGAGCGACGAG <b>TAAGCG</b> ACAA                         | -469                  | 11.85558 |
| 36   | <i>glr2944 glr2945 gsr2946</i>                                   | - - -                                       | GTGttggtggcTAC  | GTCCAGCCACACTGCCGGT <b>TATTTT</b> TAGA                           | -29                   | 11.84654 |
| 37   | <i>gll1477</i>                                                   | -                                           | GTcggcaggagGAC  | GCTGTGCTCCAGGCGGCTATGGGT <b>TAATCT</b>                           | -37                   | 11.73635 |
| 38   | <i>glr2787 glr2788 glr2789</i>                                   | - - -                                       | GTTtggccggcGAC  | TGGCGTGTCTTCATCTTAGGCAT <b>TGGTGT</b> TAC                        | -524                  | 11.73536 |
| 39   | <i>glr0098</i>                                                   | -                                           | GTTtggacggcTAC  | CCGGAATGATGTTGCAGATCCGT <b>TACACT</b> GTT                        | -58                   | 11.71579 |
| 40   | <i>glr1771</i>                                                   | -                                           | GTAgaggcaggGAC  | TTTTCTCCATCCTCTGAAGGT <b>TCTGATA</b> CT                          | -245                  | 11.71145 |
| 41   | <i>gll1545 gll1546</i>                                           | - -                                         | GTGcccgcccgCAC  | TGGGAGGGTCGGGGTTGAGCCGT <b>TACACT</b> GTA                        | -69                   | 11.69152 |
| 42   | <i>glr2813</i>                                                   | -                                           | GTTtgagtcgTTC   | CGAGAGCATGGCACCCGCG <b>TGCATT</b> GCTAC                          | -58                   | 11.68814 |
| 43   | <i>gll3195</i>                                                   | -                                           | GTAgcaaaaagcTAC | AGTTGTCTGGATAGTGAT <b>TCAAAT</b> GTAAAG                          | -38                   | 11.67703 |
| 44   | <i>gvip395</i>                                                   | <i>thrS</i>                                 | GTAcccagcaaTAC  | GCAAACGCATTGCATCGTAGTGGAG <b>TGACAT</b>                          | -59                   | 11.66554 |
| 45   | <i>gll0203</i>                                                   | <i>rpoD</i>                                 | GTAccgaccacCAC  | CCCCGCGCTCGAGTAGACCAC <b>CAACAC</b> CGCC                         | -235                  | 11.6371  |
| 46   | <i>glr0422</i>                                                   | -                                           | GTAtcctacgtTAC  | GATTATTCCTTTTCAAGGCAGAT <b>TCAACCC</b> C                         | -119                  | 11.62389 |

<sup>1</sup> Bold, -10 like boxes.

Table s5, Zhengchang Su, et al

Table s5. Predicted NtcA promoters in MED4

| Rank | Transcription unit             | Name                         | NtcA site       | Downstream of NtcA binding site<br>and -10 like box <sup>1</sup> | NtcA site<br>position | Score    |
|------|--------------------------------|------------------------------|-----------------|------------------------------------------------------------------|-----------------------|----------|
| 1    | <i>pmm0958</i>                 | -                            | GTTgctttttaTAC  | ATTTTAAATCATTTTATT <b>TAGTGT</b> TTAATTA                         | -53                   | 15.61409 |
| 2    | <i>pmm0920</i>                 | <i>glnA</i>                  | GTTacctttgaTAC  | ATAATTAGATTCGTC AAGTTAT <b>TAATTT</b> TAT                        | -52                   | 14.60082 |
| 3    | <i>pmm0246</i>                 | <i>ntcA</i>                  | GTTactgttgaTAC  | AAGTTATTTCTTGCTGCTCTCT <b>TAAGTT</b> TTT                         | -50                   | 14.18353 |
| 4    | <i>pmm0970</i>                 | <i>urtA</i>                  | GTTacctatgcTAC  | AAAAC TAAATCCCAC TCGTTT <b>TAACTTT</b> TA                        | -48                   | 13.85116 |
| 5    | <i>pmm1171</i>                 | <i>isiB</i>                  | GTAtaaaaataTAC  | ATGAAAAAGTTTTTATAAAAA <b>TAATTT</b> ATC                          | -72                   | 13.72387 |
| 6    | <i>pmm0028 pmm0029</i>         | <i>pdxA</i> -                | GTAtaatataaTAC  | ATAAAATATATTCAATCCAAGAA <b>TATAGT</b> C                          | -782                  | 13.62519 |
| 7    | <i>pmm0370 pmm0371 pmm0372</i> | <i>cynA cynB cynD</i>        | GTAtttgttaaTAC  | AACACAAGTGAAATTTAA <b>ATAACT</b> GGA                             | -55                   | 13.15913 |
|      | <i>pmm0373</i>                 | <i>cynS</i>                  |                 |                                                                  |                       |          |
| 8    | <i>pmm0803</i>                 | <i>futC</i>                  | GTAtaaaaataTAC  | AAGTGATATTTATGGTGA <b>ATTTT</b> CTGTTA                           | -64                   | 13.14794 |
| 9    | <i>pmm0579</i>                 | -                            | GTTtagacctctTAC | TCTTTGTTTTACTAAAGTT <b>TATCTT</b> ATCAGT                         | -39                   | 13.08737 |
| 10   | <i>pmm1519 pmm1520</i>         | <i>psaL psaI</i>             | GTAtaaaaagtTAC  | ACTATTTGTCCTTTAA <b>ATACTAAAGT</b> GTTC                          | -48                   | 13.02118 |
| 11   | <i>pmm0263</i>                 | <i>amt1</i>                  | GTAtaaacgacTAC  | TAGACATACATAAGTTT <b>CTGAGCA</b> AAATTA                          | -85                   | 12.92402 |
| 12   | <i>pmm0339</i>                 | <i>T8L23.23</i>              | GTTcttagtatCAC  | AACAACAACAATCACTTTTGT <b>TTAAGCT</b> TTA                         | -55                   | 12.92013 |
| 13   | <i>pmm0619</i>                 | <i>acs</i>                   | GTAgttaaaaaTAC  | ATTATGATTTTTTGAAAAT <b>TATAATTA</b> ACTTT                        | -63                   | 12.8663  |
| 14   | <i>pmm0141</i>                 | -                            | GTTctcgccaaTAC  | AATTATTTGCTGGAAGC <b>ATTAAAGT</b> TTGAT                          | -501                  | 12.85815 |
| 15   | <i>pmm0020 pmm0021 pmm0022</i> | <i>- murB murC</i>           | GTTgctgatcaTAC  | AGAATTTTGTGCAATAACGTAAG <b>TATTTT</b> TT                         | -153                  | 12.82735 |
| 16   | <i>pmm0781</i>                 | <i>cbbA, cfxA, fbaA, fda</i> | GTAcacattatTAC  | TCGATTTTTTAGTGATTTGTATAT <b>CTAATGA</b>                          | -112                  | 12.74246 |
| 17   | <i>pmm1164</i>                 | <i>futA</i>                  | GTAttaattgaTAC  | AAGGTTATGTGTAGGAAAT <b>TCTTTTAGGAT</b>                           | -81                   | 12.71619 |
| 18   | <i>pmm0709</i>                 | <i>som</i>                   | GTAAatctcttTAC  | CTTACAAAGTTATAAAAG <b>TTGGAT</b> TAACA                           | -58                   | 12.69323 |
| 19   | <i>pmm0015</i>                 | -                            | GTGtttgtctgTAC  | AATCCATCATTGGAGCAAC <b>ACTTATTTT</b> TATG                        | -96                   | 12.69013 |
| 20   | <i>pmm0278 pmm0279</i>         | --                           | GTTtaaattttTAC  | TTATATAAATTAATATAG <b>ATAATTAT</b> TGGAA                         | -52                   | 12.59038 |
| 21   | <i>pmm0919</i>                 | <i>spt</i>                   | GTAtcaaaggtAAC  | TTTTTCAACACTTGCTGG <b>TTCTTT</b> GAGTA                           | -150                  | 12.58175 |
| 22   | <i>pmm0600 pmm0601 pmm0602</i> | ---                          | GTCtattaactTAC  | CACCTAGTTATGCAAGAAG <b>TCTTAAATT</b> GAG                         | -130                  | 12.57007 |
|      | <i>pmm0603 pmm0604</i>         | --                           |                 |                                                                  |                       |          |
| 23   | <i>pmm1114 pmm1115 pmm1116</i> | <i>- crtH gidA</i>           | GTAAAatgtgagTAC | ATATGAAATTATCCCTTCTAAAG <b>GTAAAAA</b>                           | -156                  | 12.5626  |
|      | <i>pmm1117</i>                 | <i>psbY</i>                  |                 |                                                                  |                       |          |
| 24   | <i>pmm1059 pmm1060 pmm1061</i> | -- <i>trxA</i>               | GTCtgttttgtTAC  | TTATATGTTTTTATCTGTA <b>ATGAAT</b> CATCA                          | -77                   | 12.55726 |
| 25   | <i>pmm0650 pmm0651</i>         | --                           | GTCtaaacataTTC  | TGAATAGAATCTATAGACA <b>ATTTAAAT</b> AGAT                         | -62                   | 12.55306 |
| 26   | <i>pmm0357 pmm0358</i>         | <i>- thiD</i>                | GTAtcgtcccaTTC  | AAATCTATCAGACATTAT <b>TGCTAAAAT</b> TTAA                         | -138                  | 12.51801 |
| 27   | <i>pmm1462 pmm1463</i>         | <i>- glnB</i>                | GTAtcaatgatAAC  | AATCTTAGTATCGTTAAAG <b>GGTTTATAT</b> GT                          | -52                   | 12.49891 |

<sup>1</sup> Bold, -10 like boxes.

Table s6, Zhengchang Su, et al

Table s6. Predicted NtcA promoters in MIT9313

| Rank | Transcription unit                                                                                                 | Name                               | NtcA site       | Downstream of NtcA binding site<br>and -10 like box <sup>1</sup> | NtcA site<br>position |
|------|--------------------------------------------------------------------------------------------------------------------|------------------------------------|-----------------|------------------------------------------------------------------|-----------------------|
| 1    | <i>pmt2229</i>                                                                                                     | <i>urtA</i>                        | GTAtcattcacTAC  | AGAATCATGCCTGGCTGATCTT <b>TACGTTCCC</b>                          | -80                   |
| 2    | <i>pmt0601</i>                                                                                                     | <i>glnA</i>                        | GTAcctggtgcTAC  | AAAAAGGGGGCCATGCGCTGAT <b>TACGTCG</b>                            | -66                   |
| 3    | <i>pmt1831</i>                                                                                                     | <i>ntcA</i>                        | GTcaccattgcTAC  | ATGGTAGTGGAGGTCCACTCC <b>TAACTTCAT</b>                           | -123                  |
| 4    | <i>pmt1947 pmt1948</i>                                                                                             | --                                 | GTAgccggtacTAC  | ATCTGGTGGGCTAGGCAAA <b>TGCCACGCTCTC</b>                          | -60                   |
| 5    | <i>pmt2239</i>                                                                                                     | <i>nirA</i>                        | GTTcaatctgaTAC  | CGCCAATACCCTCTTCCATCAGGCT <b>TAATGA</b>                          | -470                  |
| 6    | <i>pmt1127</i>                                                                                                     | <i>trxA</i>                        | GTcagagttccTAC  | CTGTGGAGGCTCTTAAGCATGA <b>ATAAATAC</b>                           | -73                   |
| 7    | <i>pmt1023 pmt1024</i>                                                                                             | --                                 | GTcctgcccgcTAC  | TTGCTCAGATCATGCTTGT <b>CGGAGTGCCTTC</b>                          | -464                  |
| 8    | <i>pmt0496</i>                                                                                                     | <i>pcbB</i>                        | GTAgtaaatatTAC  | CTGATAATGTAGCGCCGAAT <b>TCGCTTATG</b>                            | -234                  |
| 9    | <i>pmt0830 pmt0831</i>                                                                                             | --                                 | GTTcaactgccTAC  | CACACCTAACTACCACAG <b>TAAACCCCTCC</b>                            | -155                  |
| 10   | <i>pmt1480 pmt1481</i>                                                                                             | - <i>glnB</i>                      | GTAacaacagcCAC  | AACCCAGGCCGTTGAAAAAGCC <b>CTAATGGG</b>                           | -32                   |
| 11   | <i>pmt0454 pmt0455</i>                                                                                             | --                                 | GTAaggaagagTAC  | GGAATTAACCTTTTATGCGTTAT <b>TAAACAGT</b>                          | -170                  |
| 12   | <i>pmt2246 pmt2247</i>                                                                                             | <i>sig</i> -                       | GTActctttgcTAC  | CTAAAAAGGAATAATCAGCAT <b>GCAAACAGT</b>                           | -161                  |
| 13   | <i>pmt0284</i>                                                                                                     | <i>som</i>                         | GTAtcaattgaTAC  | TTAGGGCTGTAATGT <b>TCCGTTGTGAACA</b>                             | -92                   |
| 14   | <i>pmt0091 pmt0092 pmt0093 pmt0094</i><br><i>pmt0095 pmt0096 pmt0097 pmt0098</i><br><i>pmt0099 pmt0100 pmt0101</i> | ----<br>----<br><i>hisH hisF</i> - | GTCcttgccgaTAC  | TTAATCATTCCCTTGGCT <b>TATAATTACA</b>                             | -51                   |
| 15   | <i>pmt2161 pmt2162 pmt2163</i>                                                                                     | ---                                | GTTtaaaaaaacTAC | CAAGCTGACCCTGATATTCAATGCT <b>TAAGGG</b>                          | -440                  |
| 16   | <i>pmt0600</i>                                                                                                     | <i>spt</i>                         | GTAgcaacaggTAC  | CTTCTACTGAAGCCTTGT <b>TCCTTTCTGGGT</b>                           | -472                  |
| 17   | <i>pmt0456</i>                                                                                                     | <i>sigB</i>                        | GTActcttccTAC   | GCAGTCAGGATGGAACACT <b>TTGGCTCTAGG</b>                           | -56                   |
| 18   | <i>pmt2237 pmt2238</i>                                                                                             | <i>cobA</i> -                      | GTGtctttgtgTAC  | ATTCTGAACCCGGCTGATGT <b>TGGCAACTAGA</b>                          | -591                  |
| 19   | <i>pmt0629</i>                                                                                                     | -                                  | GTctagtcttgAAC  | TCGCTCATGTTTATTGCAGAT <b>TAGCTCTCAAT</b>                         | -135                  |
| 20   | <i>pmt0842</i>                                                                                                     | -                                  | GTGcgctgatgAAC  | TCCAACACCGTGGAACAGT <b>TGAGACCCCTTT</b>                          | -632                  |
| 21   | <i>pmt0034</i>                                                                                                     | -                                  | GTAattactcaaAAC | TCCGTTCCAGCCTGTCTATCCTG <b>TACCGTTC</b>                          | -486                  |
| 22   | <i>pmt0868 pmt0869</i>                                                                                             | --                                 | GTccatagtgtTAC  | CTAACCAACCTAACAGACCCAA <b>TAAATATAG</b>                          | -466                  |
| 23   | <i>pmt1564</i>                                                                                                     | -                                  | GTGaccaaatacAAC | TATCCAAACAGAAATCTAGCT <b>ATCGATAAAA</b>                          | -175                  |
| 24   | <i>pmt0743 pmt0744</i>                                                                                             | <i>metG</i> -                      | GTcTgagagatGAC  | GGCAGACGATCAATAAGCT <b>TGAAATGAGTTGT</b>                         | -79                   |
| 25   | <i>pmt0391</i>                                                                                                     | -                                  | GTTaaaccattGAC  | AACTTGCATCCAATCGAAAA <b>TAACTGAGCTG</b>                          | -79                   |
| 26   | <i>pmt1631</i>                                                                                                     | -                                  | GCAcaccctctgTAC | ACTTGTAAAGTAAGACTTACTTTTT <b>TAGGGT</b>                          | -31                   |
| 27   | <i>pmt1839</i>                                                                                                     | <i>ams1</i>                        | GTAattaacgcTAC  | CCCTGGCATAAAGGGTGTGAAGT <b>TGCTGTC</b>                           | -634                  |
| 28   | <i>pmt1853</i>                                                                                                     | <i>amt1</i>                        | GTAacaaaatgAAC  | TTTACCCCCGCAATAGACC <b>TAAAGCGTC</b>                             | -147                  |

<sup>1</sup> Bold, -10 like boxes.

Table s7, Zhengchang Su, et al

Table s7 Predicted NtcA promoters in PCC7120 (to be continued)

| Rank | Transcription unit <sup>1</sup> | Name             | Putative ntcA site <sup>2</sup> | Downstream of NtcA binding site<br>and -10 like box <sup>3</sup> | ntcA site<br>position | Score   |
|------|---------------------------------|------------------|---------------------------------|------------------------------------------------------------------|-----------------------|---------|
| 1    | <i>alr2328</i>                  | <i>glnA</i>      | <b>GTAacaaagacTAC</b>           | AAAACGTGCTAATGTTTAGAATCTACGATAT                                  | -129                  | 14.619  |
| 2    | <i>alr0607</i>                  | <i>nirA</i>      | <b>GTAgtactactaTAC</b>          | TATTTTACCTGAGATCCCAGACATAACCTTAG                                 | -498                  | 14.515  |
| 3    | <b>all4312</b>                  | -                | GTAacaaagacTAC                  | AAAACCTTGGGCATGGCTTGTACTTTTGAA                                   | -60                   | 14.478  |
| 4    | <i>all1075</i>                  | -                | GTAcacacaaaTAC                  | TATATACAAGGGTTTCAGGCGTTATAGCCCC                                  | -298                  | 14.1783 |
| 5    | <i>alr4249</i>                  | <i>sigF</i>      | GTAattcaaaaTAC                  | TTTTATTAGTTATGATACTTGATAAGTTTCC                                  | -685                  | 14.164  |
| 6    | <i>all0602</i>                  | <i>ntcB</i>      | <b>GTAacaaaatcTAC</b>           | CAAATTGGGGAGCAAATCAGCTAACTTAAT                                   | -65                   | 14.102  |
| 7    | <i>asr0064</i>                  | -                | GTAaccttggcTAC                  | GCAACAGTTTATACCTTTATTTTCATCATAA                                  | -435                  | 14.0627 |
| 8    | <b>alr3982</b>                  | -                | GTAgtgatagcTAC                  | AAAATCCGTCGTAATTATATAAGTTCTAGTT                                  | -237                  | 13.9351 |
| 9    | <i>all2509</i>                  | -                | GTAAatgattaTAC                  | TGATTTTTTCCCAATAAAAGATTACCCTCAT                                  | -713                  | 13.8553 |
| 10   | <i>asr4313</i>                  | -                | GTAgtccttgtTAC                  | CTAGCCACAATTACCTCTACGTTTTTTTAT                                   | -465                  | 13.8443 |
| 11   | <i>all1616</i>                  | -                | GTAataaatccTAC                  | AGCCAAAAACACGCTAAAACACGCTAGGCTA                                  | -31                   | 13.7858 |
| 12   | <i>alr4308</i>                  | -                | GTAgtcggagtTAC                  | AACATATTGGGATCAGCCAGTGTAACTTTG                                   | -51                   | 13.7468 |
| 13   | <i>alr0992</i>                  | <i>amt1</i>      | GTAactaagtaTAC                  | AAGGTTACATTTTCATCAGGGAGTGGGAACAT                                 | -37                   | 13.7253 |
| 14   | <i>alr5117</i>                  | -                | GTAgtttaaTAC                    | ACATGATCTCTATATTTTTTACAGTAATCAT                                  | -153                  | 13.5645 |
| 15   | <i>all1951</i>                  | <i>urtA</i>      | <b>GTAacaaaatAAC</b>            | AAITCAATGGTTAAATATCAAACTAATATCA                                  | -101                  | 13.446  |
| 16   | <i>all1127</i>                  | -                | GTAgtcttaaatTAC                 | TCATAGTTTTGTCTTTTTTGGTAACTTTAAGCA                                | -131                  | 13.438  |
| 17   | <b>all5069</b>                  | -                | GTGttcatgtaTAC                  | TTTGTTTAAGAATAGCTATCTATACCTTAGT                                  | -214                  | 13.4139 |
| 18   | <i>alr0543</i>                  | -                | GTAagcgatcaTAC                  | TGAAACAAAAAGTTTAAAGTTTTTATAACTT                                  | -221                  | 13.3997 |
| 19   | <b>all0706 all0707</b>          | --               | GTGgaaagactTAC                  | ACCCCATACCTACCCTCAACACTATTGCCT                                   | -111                  | 13.3546 |
| 20   | <i>all3084</i>                  | -                | GTAataagtgaTAC                  | TCCCATACCAATTACCATGAATCTGCTTGG                                   | -190                  | 13.3401 |
| 21   | <i>alr5370</i>                  | -                | GTTtaaaataaGAC                  | AACAGAGACTACACCCCAATCAATAACTTCG                                  | -67                   | 13.3164 |
| 22   | <i>all2319</i>                  | <i>glnB</i>      | GTTacacagacTAC                  | ATCGAAAGTTTTTGCAGAAAATAGCATTTTG                                  | -199                  | 13.305  |
| 23   | <i>alr4392</i>                  | <i>ntcA</i>      | GTAtaggaaagTAC                  | AGAAAGGTTAACGGTGCTTTATTGATTTTTTC                                 | -98                   | 12.9867 |
| 24   | <i>all1248</i>                  | -                | GTAAttatataTAC                  | CCATTTTTAAGATAAAACAAGTATATCGTCAG                                 | -134                  | 12.9852 |
| 25   | <i>all1284</i>                  | -                | GTAAttatagctCAC                 | AAITCTTTTTTGTGCGATAAATCATAACTTAT                                 | -119                  | 12.954  |
| 26   | <i>all2327</i>                  | <i>apcF</i>      | GTAgtccttgtTAC                  | AGAAGCTCTGGATTACAGGTAATATTAACCT                                  | -218                  | 12.8922 |
| 27   | <i>alr4029 alr4030</i>          | --               | GTAcgcaacacCAC                  | GTTTAATTATGGGACAAATATTACTAGAGAA                                  | -105                  | 12.863  |
| 28   | <i>alr2825</i>                  | -                | GTAacgcacccTAC                  | TTGTATTGCAAAAATTCAAAATAATGTCCAAT                                 | -290                  | 12.7889 |
| 29   | <i>alr4156</i>                  | <i>ndhF</i>      | GTCTtataaaaTAC                  | ATAGATTTTTGTCTATGATTAGTATTAACTT                                  | -247                  | 12.7842 |
| 30   | <i>alr0276</i>                  | -                | GTTaattatTTTAC                  | CTTCTCCTATTATTCTCTTAATCTGACTTCA                                  | -191                  | 12.7679 |
| 31   | <b>alr1231</b>                  | -                | GTAatcatccaTAC                  | AATCTTATGCAATTATTA AAAACTTATTTTTG                                | -42                   | 12.7297 |
| 32   | <i>alr4965</i>                  | -                | GTGctagcctcTAC                  | GGACAATAGCTATGAATCCTTATGTGAGGAT                                  | -511                  | 12.7219 |
| 33   | <i>alr3810</i>                  | <i>sigD</i>      | GTAacaaaagcTAC                  | AATTTGCTGAATTTATAAAAGTTTTTAGTCTC                                 | -285                  | 12.7079 |
| 34   | <b>alr3920</b>                  | -                | GTAAttgtaataTAC                 | AATATTACCTGTGAATTGAAATATGTGTATG                                  | -420                  | 12.7052 |
| 35   | <b>all3660</b>                  | -                | GTAAttacgaatTAC                 | AACTGAGAAGTCATCATCTATACGTTTCTCG                                  | -737                  | 12.7033 |
| 36   | <i>alr0487</i>                  | -                | GTAgtatagctTAC                  | AAATAGCGATAAAAATTAATAGGCTATTTGCC                                 | -109                  | 12.6945 |
| 37   | <i>all2170 all2171</i>          | --               | GTAactttgcaAAC                  | ATCCTCTTATAAATAATTGATTTAAAAATA                                   | -106                  | 12.6945 |
| 38   | <i>alr2311</i>                  | <i>rbpF</i>      | GTcattgcctaGAC                  | ACCAACTTTTAATTCCCATCATCTATCCTGA                                  | -372                  | 12.6889 |
| 39   | <i>all3184</i>                  | <i>lrtA</i>      | GTCTcttttcaTAC                  | AAAAACCCATCACATCAAAATATTGTGCTAT                                  | -48                   | 12.6317 |
| 40   | <i>all4950</i>                  | -                | GTTacttcttcTGC                  | TCAGAGTTACTCATCAGCCTGTTTTAAGACA                                  | -51                   | 12.6308 |
| 41   | <i>all4813</i>                  | <i>pknC</i>      | GAGatatttatTAC                  | CATCGGCAGAACTAGGTAATAACTCTGGGG                                   | -38                   | 12.6264 |
| 42   | <i>all4006</i>                  | -                | GTcaaacagctTAC                  | GATATAAAGCTTTAACCTGTCAAATTTATCT                                  | -369                  | 12.5808 |
| 43   | <i>alr2514 alr2515</i>          | <i>coxB coxA</i> | GTAccaaaaaaTAC                  | CGAGAATCACCAAAAACCTTCACGGTAAACAA                                 | -410                  | 12.5528 |
| 44   | <i>alr3280</i>                  | <i>sigE</i>      | GTtggtattatTAC                  | TAATAATAGAGTCTAATAGAGCTAGTTTCTG                                  | -636                  | 12.5423 |
| 45   | <i>alr3979</i>                  | <i>pex</i>       | GTAgcgctataTAC                  | TTACACATTTGCAAGTAGCGCCCTATACTGA                                  | -86                   | 12.5394 |
| 46   | <i>all0909 all0910 all0911</i>  | ---              | GTTatcctagtTAC                  | GGATAGGCATTATTTCTCATAAAATAAGCTCT                                 | -349                  | 12.5238 |
| 47   | <i>asr1275 alr1276</i>          | --               | GTAgtataactTAC                  | ATAAAACCCACTTTTGTATTAACAACACAT                                   | -681                  | 12.5183 |
| 48   | <i>all1020 all1021</i>          | --               | GTActtttataTAC                  | AAAGTTATGTGGTTTACATAAGATACGCATA                                  | -90                   | 12.5175 |
| 49   | <i>alr2877</i>                  | <i>cmpA</i>      | GTAagtataaaAAC                  | TATATCTATAGTTTTAGATGATAAATTTGCAT                                 | -480                  | 12.499  |
| 50   | <i>all2364</i>                  | <i>accD</i>      | GTAacggtcatTAC                  | CCCATTGATACTTGAGATTTTGATAAATATCA                                 | -589                  | 12.4973 |
| 51   | <i>alr0165</i>                  | -                | GTTtttgctatTAC                  | CATCTTGAATATTTAAATAAAATAAATCATC                                  | -240                  | 12.4797 |
| 52   | <i>all5185</i>                  | -                | GTTttcagcgtTAC                  | TTTAAAGTAGTTAAGGATAATGTCAACAACA                                  | -157                  | 12.459  |
| 53   | <i>all3680</i>                  | -                | GTTaacgccttTAC                  | AGTAAACCAGTATTGGATTTTGAATAGACTA                                  | -643                  | 12.4574 |

## Table s7(continued), Zhengchang Su, et al

Table s7. Predicted NtcA promoters in PCC7120 (continued)

| Rank | Transcription unit <sup>1</sup> | Name             | Putative ntcA site <sup>2</sup> | Downstream of NtcA binding site<br>and -10 like box <sup>3</sup> | ntcA site<br>position | Score    |
|------|---------------------------------|------------------|---------------------------------|------------------------------------------------------------------|-----------------------|----------|
| 54   | <i>alr3376</i>                  | -                | GTTttttccatTAC                  | CTATGACATTAGATCCAAAAAGT <b>TAATTT</b> TATT                       | -177                  | 12.44031 |
| 55   | <i>alr0021</i>                  | <i>apcA</i>      | GT <b>Cacttcttt</b> TAC         | TGCTGTGTCTACAAGGCGAGAGT <b>TAATTC</b> TCTC                       | -104                  | 12.40309 |
| 56   | <b>all0330</b>                  | -                | GTTGtaattttgTAC                 | AATGCAGCTGTGACGTGGAT <b>CTAGTT</b> TCAGAT                        | -52                   | 12.38822 |
| 57   | <i>alr0440</i>                  | -                | GTGttttcagTAC                   | AGTTATGCCAGATGCAAT <b>TAAGCC</b> ACAATGT                         | -83                   | 12.37565 |
| 58   | <i>all1327</i>                  | -                | GTAgtgtatgtTAC                  | AGAAAAATTAATTTAATATAGAT <b>TATTTT</b> TATA                       | -37                   | 12.36931 |
| 59   | <i>all3375</i>                  | -                | GTTagtactcaTAC                  | ATCTAGACAATAGATGTAATG <b>TAAC</b> TTTGGT                         | -84                   | 12.34861 |
| 60   | <i>alr0080</i>                  | -                | GTTttttaaatTAC                  | CTACAATCAATTGCCAAAT <b>CCAC</b> AGCTATTA                         | -310                  | 12.34684 |
| 61   | <i>all3040</i>                  | -                | GTTgtataatcTAC                  | TTTTGAATTTTGAATTTTGAATTT <b>TA</b> AAT                           | -118                  | 12.3115  |
| 62   | <i>all4107</i>                  | -                | GTA <b>t</b> cgagaggTAC         | TGGCTCGTAAACCCCGGT <b>TGGG</b> AGCAAGGC                          | -461                  | 12.30874 |
| 63   | <i>all0041 all0042</i>          | --               | GTA <b>ttt</b> atctcaTAC        | AAAAAAACATTACAAATGAT <b>GAGG</b> TAGTATC                         | -735                  | 12.29755 |
| 64   | <i>alr3882 alr3883</i>          | --               | GTA <b>ctt</b> tttagaTAC        | TATTGTGAAAGCTCATCTG <b>TACT</b> TTTACCCT                         | -98                   | 12.29166 |
| 65   | <i>alr2785</i>                  | -                | GTGaaatcctaTAC                  | CCTTTTAGGGATGGGATGAGCT <b>TAAAG</b> TTAT                         | -78                   | 12.28042 |
| 66   | <i>alr4239</i>                  | -                | GTTggagggtatTAC                 | ATTTTGATCTGAATAATTT <b>CAG</b> ATTAG <b>TT</b> TA                | -215                  | 12.27095 |
| 67   | <i>alr2471</i>                  | -                | GTA <b>cct</b> gtggcTAC         | ACATTGTTACTGATTTT <b>TA</b> CT <b>CA</b> AAAT <b>T</b> GCTG      | -164                  | 12.25365 |
| 68   | <i>all0866 alr0867</i>          | <i>ccmL ccmK</i> | GTA <b>gtt</b> tttcttTAC        | ACTGCGCTGTGCCAAAAGCCGAG <b>TAAAA</b> AAA                         | -105                  | 12.23615 |
| 69   | <i>all4756</i>                  | -                | GTA <b>g</b> acgctcgCAC         | CCTAGGTCATTAAGACCGCTTT <b>TG</b> AG <b>CA</b> TG                 | -188                  | 12.2266  |
| 70   | <i>all1601</i>                  | -                | GTA <b>g</b> tcagctcgTAC        | TAACCACTGAAGACAAGAA <b>CTAGT</b> CAAGAAG                         | -248                  | 12.21125 |
| 71   | <i>all1235</i>                  | -                | GTAAAAcaacTAC                   | TCCAAGTACTTCTATTTG <b>TAA</b> ACTTTGAGA                          | -165                  | 12.20566 |
| 72   | <i>alr4641</i>                  | -                | GT <b>C</b> cccaatgcTAC         | GACTTTTCTGAGACTT <b>CTAA</b> ACTAGCTTCT                          | -386                  | 12.20396 |
| 73   | <i>alr0786</i>                  | -                | GTA <b>tt</b> gatcaaTAC         | TGGGGGTTAACCCATCTATCCGCA <b>TA</b> ATTT                          | -60                   | 12.1998  |
| 74   | <i>all0187</i>                  | -                | GTG <b>cg</b> gtcctaCAC         | TGGCAAGATTGGTAGCTTGCTT <b>TA</b> ACAT <b>AA</b>                  | -62                   | 12.19843 |
| 75   | <i>alr0038 alr0039</i>          | <i>rfbB</i>      | GT <b>A</b> atcaacagTAC         | TACCGATAGCAGAAAGCGCTGGT <b>TAG</b> CA <b>T</b> C                 | -630                  | 12.19774 |
| 76   | <i>alr3718</i>                  | -                | GTG <b>att</b> gttcaCAC         | AACAAC <b>T</b> TCCAAGCATGGAGG <b>TAT</b> CTGCTG                 | -755                  | 12.19582 |
| 77   | <i>all3538</i>                  | -                | GT <b>A</b> atcgatttTAC         | TCGGTTCAATAATTATCTCCAGT <b>TAAAA</b> AAT                         | -231                  | 12.17417 |
| 78   | <i>all3116</i>                  | -                | GTA <b>g</b> gggatgtTAC         | GGCAAAATTAGCCAAAGCGATCGCT <b>CA</b> ATTG                         | -196                  | 12.09504 |
| 79   | <i>all3582</i>                  | -                | GTT <b>ta</b> gtcctgTAC         | ACTAGAACAAGACCT <b>CTTA</b> ACTGAAGTCTT                          | -79                   | 12.09369 |
| 80   | <i>alr2921 alr2922</i>          | --               | GTG <b>gt</b> ccttgaTAC         | AATACTTTAAGATGACTGTTAT <b>TAT</b> GC <b>TT</b> TC                | -300                  | 12.08668 |
| 81   | <i>alr3705</i>                  | -                | GTT <b>tt</b> aggtgaTAC         | TAAAGGCGATCGCAATATTT <b>TA</b> ATATGAGCG                         | -42                   | 12.06532 |
| 82   | <i>alr3738</i>                  | -                | GTT <b>ag</b> cccttAAC          | AGTTTAGCCTCATGAAAGCT <b>TA</b> ACTTAGTATT                        | -54                   | 12.05389 |
| 83   | <i>all3408 asl3409 all3410</i>  | ---              | GT <b>A</b> aatagaaaCAC         | ACTTAGTAAGTGATTTTGGTT <b>CTAA</b> ATATGT                         | -464                  | 12.05173 |
| 84   | <i>alr3710 alr3711</i>          | <i>devB devC</i> | <b>GTAcagctctgt</b> TAC         | CTTTACCTGAAACAGATGAATG <b>TAGA</b> ATTTA                         | -738                  | 12.04803 |
| 85   | <i>all4236</i>                  | -                | GTT <b>ct</b> tagccaaTAC        | TTCGCAATAGAGATGCACA <b>ATA</b> TGGCTCTC                          | -418                  | 12.04208 |
| 86   | <i>alr0892 alr0893</i>          | --               | GTT <b>ag</b> gagtttTTC         | ATGCCAGTAA <b>AA</b> CTGATCA <b>ATA</b> ATTTT <b>TA</b> AA       | -124                  | 12.03502 |
| 87   | <i>all3903</i>                  | -                | GT <b>C</b> tactatacTAC         | TATATAGTAATATAATATTT <b>TAT</b> GT <b>TT</b> TATA                | -81                   | 12.02717 |
| 88   | <b>alr1712</b>                  | -                | GTGataaaaaTAC                   | CTTAATTT <b>CG</b> ATAATAAACAT <b>TGATA</b> AA <b>CA</b> T       | -511                  | 12.0257  |
| 89   | <i>alr1537</i>                  | -                | GT <b>T</b> acaaattaTAC         | CAATCAAAGCAGTATTACAA <b>ACTAT</b> TTGCT                          | -107                  | 12.02084 |
| 90   | <i>alr3790</i>                  | -                | GACaatattcaTAC                  | CACAGCCAGAGAAAATA <b>AA</b> CGG <b>ATA</b> ACTTA                 | -75                   | 12.01766 |
| 91   | <i>alr1785</i>                  | -                | GTA <b>gt</b> tattaaTAC         | TGAAGTTT <b>TAG</b> TATAAAGTTT <b>TG</b> CTAG <b>GT</b>          | -59                   | 12.01261 |
| 92   | <i>all1291</i>                  | <i>cynS</i>      | GTA <b>g</b> aagagggAAC         | TACAATGACCTACGATCAC <b>CTAC</b> GGTGGAGC                         | -107                  | 11.99881 |
| 93   | <b>all1070 all1071</b>          | --               | GTT <b>aa</b> acgtggTAC         | ATAATTTATATAAGAAATAAG <b>TA</b> ATTT <b>CA</b>                   | -187                  | 11.99609 |
| 94   | <i>alr3874</i>                  | -                | GTT <b>cg</b> gttaatTAC         | CCAGCAAAATACGCATTT <b>TAG</b> AGTTGTT <b>AA</b>                  | -32                   | 11.99544 |
| 95   | <i>alr1240 alr1241</i>          | <i>zam</i>       | GT <b>A</b> ttttccctTAC         | ATAGCGCTTTTGGTCAGCG <b>TAG</b> AGAG <b>TA</b> AA <b>T</b>        | -385                  | 11.9935  |
| 96   | <i>all4248</i>                  | -                | GTA <b>ttt</b> tgaaTAC          | AATTTTAT <b>TT</b> CTAAAGAAAGAAA <b>ATTA</b> AA <b>T</b>         | -103                  | 11.97364 |
| 97   | <i>all5097</i>                  | -                | GT <b>C</b> aaaagtcaAAC         | CTCTTGACCTTTGACTATTGAATTT <b>TG</b> AAA <b>A</b>                 | -309                  | 11.95972 |
| 98   | <i>alr0522</i>                  | -                | GTT <b>ca</b> gcaattTAC         | AGTTAAGTCAACACAGTTAGTCTTT <b>TAT</b> TT <b>TT</b>                | -722                  | 11.94098 |
| 99   | <i>all1731</i>                  | -                | GTT <b>ca</b> gataagTAC         | TAATATCTGTTGGTATCTACCAG <b>CTAA</b> AA <b>TC</b>                 | -138                  | 11.92767 |
| 100  | <b>alr0295 alr0296</b>          | --               | GT <b>A</b> ataactatTAC         | TCAATAGATTAGGCTAAAT <b>TAG</b> CGTT <b>TA</b> AA                 | -71                   | 11.92562 |
| 101  | <i>alr3955</i>                  | -                | GT <b>C</b> aaaagcggTAC         | TGAAATATAGCTGCTATA <b>AAAA</b> CA <b>TTA</b> ACT <b>AG</b>       | -95                   | 11.92449 |
| 102  | <i>alr1250</i>                  | -                | GTAatataaaTAC                   | ATGAATAA <b>AT</b> CTAAAATACAG <b>GTAT</b> GGT <b>G</b> AG       | -309                  | 11.92065 |
| 103  | <i>alr4354</i>                  | -                | GT <b>C</b> ctcgatttTAC         | TGTGCGAGGATTTTAGTAAAG <b>ACTTA</b> AA <b>TGA</b>                 | -160                  | 11.91353 |
| 104  | <i>all0443</i>                  | -                | GTG <b>ac</b> aaaagtCAC         | TAATATTTGCTTATTTATATAG <b>CTAT</b> AG <b>T</b>                   | -480                  | 11.91314 |
| 105  | <i>alr1602</i>                  | <i>devB</i>      | GT <b>A</b> cgactgacTAC         | TGACAAGCAGCTAGAGAAAGTG <b>ATA</b> AG <b>GATA</b>                 | -151                  | 11.90962 |
| 106  | <i>all1837 all1838 asl1839</i>  | ---              | GT <b>A</b> ccggatacCAC         | CTATTCTTGATATGAA <b>ATCC</b> GT <b>TA</b> ACT <b>CA</b>          | -250                  | 11.90219 |
|      | <i>asl1840 all1841 all1842</i>  | ---              |                                 |                                                                  |                       |          |
|      | <i>all1843</i>                  | -                |                                 |                                                                  |                       |          |

<sup>1</sup> Bold, putative sensor kinase or response regulator; <sup>2</sup>bold, experimentally verified binding sites; <sup>3</sup>bold, putative -10 like boxes .



Table s8, Zhengchang Su, et al

Table s8. Predicted NtcA promoters in PCC6301

| Rank | Transcription unit                                                 | Name                                   | NtcA site       | Downstream of NtcA binding site<br>and -10 like box <sup>1</sup> | NtcA site<br>position | Score   |
|------|--------------------------------------------------------------------|----------------------------------------|-----------------|------------------------------------------------------------------|-----------------------|---------|
| 1    | <i>syc1985_d syc1986_d syc1987_d</i><br><i>syc1988_d syc1989_d</i> | - <i>cynA cynB</i><br><i>cynD cynS</i> | GTAacgacggcTAC  | ATTTTGACCCTGGGGTTACTACT <b>TACCATT</b> CG                        | -54                   | 15.0095 |
| 2    | <i>syc1638_c</i>                                                   | -                                      | GTAaagcgcaaTAC  | AGAAGCCACAATGGACAGCTTGCT <b>TAGGTTAA</b>                         | -146                  | 14.7153 |
| 3    | <i>syc1639_d</i>                                                   | -                                      | GTAatcgctttTAC  | GAGCGCGACTTCGAGCACCCG <b>TGCTCT</b> CCCT                         | -174                  | 14.5871 |
| 4    | <i>syc0921_d syc0922_d</i>                                         | <i>glgC</i> -                          | GTAgccttgggtTAC | CTCCGATCGATCCCGGAGCTGCG <b>TAGGGTAA</b>                          | -121                  | 14.5638 |
| 5    | <i>syc1821_c</i>                                                   | <i>amt1</i>                            | GTAgcaaaaagtTAC | GTATATCACCAGTCTGCCT <b>TAGCCAGAGT</b> TGT                        | -72                   | 14.5596 |
| 6    | <i>syc2377_c syc2378_c</i>                                         | <i>metX</i> -                          | GTAgcgatcgctTAC | AGCAGCAACAAAGATTGACACG <b>ATTGGTTAG</b>                          | -116                  | 13.9901 |
| 7    | <i>syc0310_d</i>                                                   | <i>nirA</i>                            | GTAgcaattgctTAC | TAAAACTGCGATCGCTGCT <b>GAAATGAGCTG</b>                           | -207                  | 13.9832 |
| 8    | <i>syc0700_d syc0701_d syc0702_d</i><br><i>syc0703_d syc0704_d</i> | - <i>merR</i> -<br>--                  | GTAgtcaccgctTAC | AGTCATTCCCTAGAACTTGT <b>TTTAGTTAATT</b>                          | -80                   | 13.8317 |
| 9    | <i>syc1192_d</i>                                                   | <i>glnB</i>                            | GTAgcagtaacTAC  | AACTGTGGTCTAGTCAGCGGTG <b>TACCAAAG</b>                           | -90                   | 13.7626 |
| 10   | <i>syc1377_c</i>                                                   | <i>ntcA</i>                            | GTAgcagttgctTAC | AAGCAGCAGCTAGGCTAGGCCG <b>TACGGTAA</b> C                         | -142                  | 13.5778 |
| 11   | <i>syc0699_c</i>                                                   | -                                      | GTAacggtgactTAC | TAAATGATTGCCTGTT <b>TAACTGACTTAATT</b>                           | -105                  | 13.5477 |
| 12   | <i>syc0006_c</i>                                                   | -                                      | GTAacaaaagcTAC  | ACACCCGACGAATCCT <b>TAAACAAATAATTAA</b>                          | -67                   | 13.429  |
| 13   | <i>syc0513_c syc0514_c syc0515_c</i>                               | ---                                    | GTAatcccgaacTAC | AGAAGTGGACTCTGAGCGA <b>TTCTATAGTCC</b>                           | -60                   | 13.3282 |
| 14   | <i>syc2346_d</i>                                                   | -                                      | GTAgcaataaTAC   | AAAAATGGCACCCGCGATCG <b>CTCAGACGGCTGC</b>                        | -98                   | 13.3005 |
| 15   | <i>syc0308_c syc0309_c</i>                                         | <i>ntcB nirB</i>                       | GTAacagaaacTAC  | AACTTTTTGTAAATCATGCAT <b>GTCTT</b> GCAAG                         | -207                  | 13.1924 |
| 16   | <i>syc2474_d</i>                                                   | <i>cmpA</i>                            | GTAaatgtttcTAC  | ATGCAAAACGCAAAGTCTATTGACT <b>TAGCTC</b>                          | -206                  | 13.0616 |
| 17   | <i>syc0649_c</i>                                                   | -                                      | GTAactggataCAC  | AGCTTGCCCTAGAGCGGGT <b>TAGCGT</b> GAT                            | -67                   | 13.0216 |
| 18   | <i>syc0953_d syc0954_d syc0955_d</i>                               | <i>rpoD4 codA</i> -                    | GTAatcccgaacTAC | TAAATGCAACAAAGACTGTCA <b>CTACTTTAAC</b>                          | -146                  | 12.9658 |
| 19   | <i>syc0508_d</i>                                                   | -                                      | GTAgccttgcctTAC | ACTTTGCCGATCTGGCCT <b>TCTTAGAT</b> GCC                           | -93                   | 12.7814 |
| 20   | <i>syc0545_d</i>                                                   | -                                      | GTAgcctctgtTAC  | TGTTCAATTAGACGTTCA <b>ATGAAATCCCTAAA</b>                         | -242                  | 12.7237 |
| 21   | <i>syc2196_d</i>                                                   | -                                      | GTTctgatattTAC  | CAAAGCGATCGCGGTAG <b>GGTGGT</b> TCGCAGGG                         | -554                  | 12.5616 |
| 22   | <i>syc1440_d syc1441_d</i>                                         | <i>rfbF rfbG</i>                       | GTGattccaaaTAC  | TGCTTAGGTTGCAAA <b>GTAAATGT</b> TATTTAA                          | -125                  | 12.424  |
| 23   | <i>syc2140_d syc2141_d</i>                                         | <i>pyrG</i> -                          | GTAactcacgcTAC  | CGAGCAGAACAGTCCGGAACAGGG <b>CTCGGCG</b>                          | -275                  | 12.4066 |
| 24   | <i>syc0416_d syc0417_d</i>                                         | --                                     | GTAcacatttaAAC  | TATTTTATTGCGATTATAT <b>TTCTTTAGTTT</b>                           | -413                  | 12.399  |
| 25   | <i>syc0002_c</i>                                                   | <i>isiA</i>                            | GTCggctagaaTAC  | CTAGAGTTCGTCG <b>TAAAACTTAATATCAACT</b>                          | -77                   | 12.2816 |
| 26   | <i>syc1620_d</i>                                                   | -                                      | GTGtagctagtTAC  | GGATCAGGTTGACTAAAG <b>TCCGGCAGAA</b> TAG                         | -66                   | 12.2728 |
| 27   | <i>syc2410_d</i>                                                   | <i>cysA</i>                            | GTAatcatgccaGAC | ATAAGGTGCAACTAAAT <b>TCTCCTAAAT</b> TTC                          | -71                   | 12.242  |
| 28   | <i>syc1403_c</i>                                                   | <i>ndbA</i>                            | GTGacttaggcTAC  | GGTCGTGCCTTACAAT <b>TCTTGACCTACTGCG</b>                          | -104                  | 12.1682 |
| 29   | <i>syc0172_d</i>                                                   | <i>ppa</i>                             | GTTgctccgaTAC   | CAGCGCACTAAGCTCAAT <b>CCCAAAGTACTGC</b>                          | -185                  | 12.1667 |
| 30   | <i>syc1049_d syc1050_d syc1051_d</i>                               | <i>pgm secG</i> -                      | GTAagcctcaaTAC  | AATTTGGGGGATCGAGCA <b>ATTACAGCT</b> TGGG                         | -373                  | 12.1515 |
| 31   | <i>syc0822_c</i>                                                   | -                                      | GTGgttttctaTAC  | TGTTGTTACAAAGCT <b>TCTGACAATCTAGGTTA</b>                         | -37                   | 12.146  |
| 32   | <i>syc1389_d</i>                                                   | -                                      | GTAgcgatcgccAC  | AAATATTTACAGAATATTGG <b>CTAAGCT</b> GTGG                         | -58                   | 12.1316 |
| 33   | <i>syc0512_d</i>                                                   | -                                      | GTAgtgtgagcTAC  | TGTTTGCGCTGGCAGCG <b>CTTAGGGT</b> TGTTGCA                        | -123                  | 12.1236 |
| 34   | <i>syc1918_c</i>                                                   | <i>natD</i>                            | GTAaggtaccgaGAC | TGCCTTGAAC <b>TGGGGGTGAATGGCT</b> TAAAG                          | -503                  | 12.1178 |
| 35   | <i>syc1076_c</i>                                                   | <i>amt1</i>                            | GTTacatcgatTAC  | AAAACAACCTTGAGTCTCG <b>CTGAATG</b> CCTTAC                        | -112                  | 12.092  |
| 36   | <i>syc0509_c syc0510_c syc0511_c</i>                               | ---                                    | GTAgtcacgcTAC   | GAATTGAAAGCTGGTGCAG <b>CCCTAGCT</b> TGGA                         | -58                   | 12.0575 |
| 37   | <i>syc0934_c</i>                                                   | -                                      | GTAatcgattcTAC  | CGAGCGGACGCCAA <b>TGCTTAAAGCAT</b> CGTTA                         | -96                   | 12.0356 |
| 38   | <i>syc2171_d</i>                                                   | <i>sigG</i>                            | GTTgcccagccCAC  | ATCCAGTGGCACCCGCGATCG <b>CTACTGTTG</b>                           | -221                  | 11.9328 |
| 39   | <i>syc2184_d syc2185_d syc2186_d</i>                               | <i>zam ubiX</i> -                      | GTTcacctgtcTAC  | TCCGGCTGGCTATTCTCG <b>TTGCTTAGATTG</b>                           | -171                  | 11.9236 |
| 40   | <i>syc0204_d</i>                                                   | -                                      | GTTggcgaactGAC  | AGACCTCGCGATGCAG <b>TTGCGCGTAGGTCAG</b>                          | -380                  | 11.9233 |

<sup>1</sup> Bold, -10 like boxes.

Table s9, Zhengchang Su, et al

Table s9. Predicted NtcA promoters in PCC6803

| Rank | Transcription unit           | Name                | NtcA site <sup>1</sup> | Downstream of NtcA binding site<br>and -10 like box <sup>2</sup> | NtcA site<br>position | Score   |
|------|------------------------------|---------------------|------------------------|------------------------------------------------------------------|-----------------------|---------|
| 1    | <i>slI1330</i>               | -                   | GTAactgttgtTAC         | AAAGCCTTGACATTGACTTTGTT <b>AGATTAAC</b>                          | -60                   | 14.7137 |
| 2    | <i>slr1756</i>               | <i>glnA</i>         | <b>GTAgcgaaaaaTAC</b>  | ATTTTCTAACTACTTGACTCTT <b>TACGAT</b> GGA                         | -85                   | 14.5902 |
| 3    | <i>slr0447</i>               | <i>urtA</i>         | GTAtcctatgcTAC         | ATAATTTTTTCTTAACCTACTCGT <b>AGTATGG</b>                          | -198                  | 14.5627 |
| 4    | <i>slr0898</i>               | <i>nirA</i>         | GTAatttacgtTAC         | AAATTTTAAACGAAACGGGAACCC <b>TATATTGA</b>                         | -61                   | 14.523  |
| 5    | <i>ssr1562</i>               | -                   | GTAatcgataaTAC         | AGCAAAGCCCCCTTTGTTT <b>GATTTGGGGT</b>                            | -65                   | 14.1297 |
| 6    | <i>slr0801</i>               | -                   | GTAgcgaaacaTAC         | AAGTGTTAGAAATTT <b>CGAGGCTTACAGT</b> TGA                         | -73                   | 14.0459 |
| 7    | <i>slI1294</i>               | <i>pilJ</i>         | GTCTtaatcctTAC         | TTTTTCACCTTAACAGAGTCT <b>TAATTTTCAT</b>                          | -92                   | 13.9365 |
| 8    | <i>ssl0707</i>               | <i>glnB</i>         | <b>GTActgattttTAC</b>  | AAAAAACTTTTGGAGAACATGT <b>TAAAAGT</b> G                          | -169                  | 13.9072 |
| 9    | <i>slI0108</i>               | <i>amt1</i>         | <b>GTAgtaaatcaTAC</b>  | AGAAAACAATCATGTAAAAAT <b>TGAA TACTCT</b>                         | -174                  | 13.8698 |
| 10   | <i>slr1597</i>               | -                   | GTAtccattttTAC         | GGTTTTTCAAGATCATGTCAAGGA <b>TGGTCA</b>                           | -226                  | 13.8343 |
| 11   | <i>slI0783</i>               | -                   | GTAtgtttcgcTAC         | AAATTGATGATCTCTGATTCTAT <b>TAATAGGA</b>                          | -379                  | 13.7161 |
| 12   | <i>slI1689</i>               | <i>rpoD2-V/sigE</i> | <b>GTAtcacgaatTAC</b>  | ACTGCCGTGAAAATTTA <b>ACGA TATTTT</b> GGAC                        | -296                  | 13.5867 |
| 13   | <i>slI1291</i>               | -                   | GTAattagggaTAC         | TTAACTAAAAAGAGTTGAAC <b>CTATATCAAAA</b>                          | -342                  | 13.4693 |
| 14   | <i>slI1077</i>               | <i>speB</i>         | GTAgcacagaaCAC         | AGTTAACTTAATCATCC <b>CTAGCTAGGGTAGG</b>                          | -226                  | 13.2741 |
| 15   | <i>slr1147</i>               | -                   | GTAatgatagtTAC         | AAAAGCCGTGCCGATTAT <b>TCCGGTCTAATT</b>                           | -201                  | 13.2353 |
| 16   | <i>slr0851</i>               | <i>ndh</i>          | GTAacaaccatTAC         | CGGTAATCCCAAGGAAATGAT <b>TACCATTAA</b>                           | -59                   | 13.153  |
| 17   | <i>slr0789 slr0790</i>       | <i>-umuC</i>        | GTAaagtaagcTAC         | TTTTTATTTGTCTTTTTGGCA <b>AAACGTTATG</b>                          | -186                  | 13.1432 |
| 18   | <i>slr1686</i>               | -                   | GTAcfaatgggaAAC        | GATTAATCAAATGCACGC <b>ATAACTTGAA</b>                             | -29                   | 13.0763 |
| 19   | <i>slr0623</i>               | <i>trxA</i>         | GTCCcaacctgTAC         | AATGAAGAGGGCGGAGACG <b>TAAGTTCCGTT</b>                           | -232                  | 13.019  |
| 20   | <i>slr0949 slr0950</i>       | <i>urtB</i> -       | GTAgggtagctTAC         | GGCGACATCGCCCTTGGTCTCACG <b>TAGGAA</b>                           | -36                   | 12.9839 |
| 21   | <i>slr0054</i>               | <i>dgkA</i>         | GTAatccaggtTAC         | ATAGGAGAATTGTTCTGT <b>CGACTTACTGCT</b>                           | -47                   | 12.8624 |
| 22   | <i>slI1699 slI1698</i>       | --                  | GTCAAataggcTAC         | ATAAAGCCTACCGATCCGGCCT <b>TAACTGAA</b>                           | -248                  | 12.8554 |
| 23   | <i>slI0837</i>               | -                   | GTGttgggcccTAC         | CCTATTTAACCTAATGAT <b>TAGGTTT</b> TGCTTT                         | -84                   | 12.699  |
| 24   | <i>slI1624 slI1623</i>       | --                  | GTAcctaaaccCAC         | CAAGGCCGGACCATTTTCTG <b>CCCCTAATCCA</b>                          | -114                  | 12.6251 |
| 25   | <i>slI0947</i>               | <i>lrtA</i>         | GTCTtattcaaTAC         | ATAGTGCTAATCTGAAGAT <b>AGTCT</b> TAGGAGT                         | -331                  | 12.6022 |
| 26   | <i>slr0257</i>               | <i>ctpB</i>         | GTTtttcttataAAC        | TAAAGTTTTAATTAATCAGTCA <b>ACTTAATCT</b>                          | -270                  | 12.5681 |
| 27   | <i>slr1622</i>               | <i>ppa</i>          | GTTcttctaataTAC        | TCGCAATTGGGGATAGGTG <b>TCGCTTAAGTTA</b>                          | -238                  | 12.5541 |
| 28   | <i>slI0807</i>               | <i>cfxE</i>         | GTTtggggggccTAC        | TACAATTGACCGTAATTGTT <b>TACTACTGAATT</b>                         | -72                   | 12.5109 |
| 29   | <i>slr1849</i>               | <i>merA</i>         | GTTttttcattTAC         | ATTCACGTATCCATCGTTAT <b>CTAAGAAAGCG</b>                          | -286                  | 12.4384 |
| 30   | <i>lr1923 slr1924 slr192</i> | -- <i>cbiB</i>      | GTTgttgaacgTAC         | CTTTGCTTGGTTTGGT <b>CGCTACCGT</b> CGTTTA                         | -279                  | 12.4196 |
| 31   | <i>slr1906 slr1907</i>       | --                  | GTActtctcatTAC         | TTTCTTGAAACTCTCTAAAT <b>TCCCGGCAAGG</b>                          | -252                  | 12.3395 |
| 32   | <i>ssr2047</i>               | -                   | GTAaagtcctttTCC        | TCAATAATCCTAAAACAACACT <b>TAAACTGAA</b>                          | -325                  | 12.3203 |
| 33   | <i>slr0670</i>               | -                   | GTActagcaacAAC         | CATGCCAGCGGAGGGCAGAT <b>TTTTATTA</b>                             | -28                   | 12.3202 |
| 34   | <i>slI0638</i>               | -                   | GTAgtgattccCAC         | CGTAGTCAAAGAAAATCT <b>TAATCAGGAATCG</b>                          | -53                   | 12.2868 |
| 35   | <i>slI1566</i>               | <i>otsA</i>         | GTAattagtgtTAC         | GGCATTTTACTGACGGGTTAAG <b>TAACTTTTA</b>                          | -269                  | 12.2712 |
| 36   | <i>slr1379 slr1380</i>       | <i>cydA cydB</i>    | GTAgctgacaaTAC         | AGAGACTTTACCTGGGATTTCTG <b>TAGTTTT</b>                           | -115                  | 12.2343 |
| 37   | <i>slI1247</i>               | -                   | GTGatctagatCAC         | CTCCCATGGGTGCTTGCATCA <b>CTTACATTGG</b>                          | -152                  | 12.2249 |
| 38   | <i>slr0935 slr0936</i>       | <i>-nadC</i>        | GTAcagatacTAC          | GGGATTATCCCTACCTCA <b>CTCCGCATCCAG</b>                           | -674                  | 12.2247 |
| 39   | <i>slr1428</i>               | -                   | GTAtatctagaGAC         | AAATCCTGGTCGGGATAGGG <b>TAGTCAAGTAG</b>                          | -140                  | 12.189  |
| 40   | <i>slI0261</i>               | -                   | GTGacattttttTTC        | CTTCAGATTCCCCTTTTT <b>TAGGACGT</b>                               | -28                   | 12.1721 |
| 41   | <i>slr1919</i>               | -                   | GTCgcggtttttTAC        | ATTTCTTTAAGTTTTAGGTAG <b>TAAAAATTC</b>                           | -66                   | 12.1434 |
| 42   | <i>slr1697</i>               | <i>pknA</i>         | GTTtcctttttTAC         | TGATTTGTATTAATGCTG <b>CTTAGTTTGC</b> GA                          | -269                  | 12.1168 |
| 43   | <i>slI0900 slI0899</i>       | <i>hisG glmU</i>    | GTAttatcgatTAC         | AATTCTTTGCACTTCCGT <b>ATAAATACTTAAT</b>                          | -165                  | 12.1068 |

<sup>1</sup> Bold, experimentally verified binding sites; <sup>2</sup> bold, -10 like boxes.

Table s10, Zhengchang Su, et al

Table s10. Predicted NtcA promoters in thermosynechococcus

| Rank | Transcription unit             | Name             | NtcA site       | Downstream of NtcA binding site<br>and -10 like box <sup>1</sup> | NtcA site<br>position | Score    |
|------|--------------------------------|------------------|-----------------|------------------------------------------------------------------|-----------------------|----------|
| 1    | <i>tlr1330</i>                 | -                | GTAttattcgtTAC  | GAAATGATAGGTATTAGATTTGCT <b>AGATTAG</b>                          | -125                  | 14.75439 |
| 2    | <i>tlr1349</i>                 | <i>nirA</i>      | GTAgcaaaattTAC  | AAATGTTTCATGATTCATCTGGCT <b>AAATTGGA</b>                         | -69                   | 14.74845 |
| 3    | <i>tlr1120</i>                 | <i>urtA</i>      | GTAgcctagcaTAC  | AGTTTGCCCCAATAACCTCCTCT <b>TAAGCTAT</b>                          | -68                   | 14.69383 |
| 4    | <i>tsr2448</i>                 | -                | GTAttggatatTAC  | AATTTGCCAATCCTGAATCC <b>TAGGGTCTCTT</b>                          | -50                   | 14.60239 |
| 5    | <i>tll1021 tll1022 tll1023</i> | ---              | GTtaagcgggaTAC  | ATTTTTGGGAAGGCATGAGCTT <b>TAAAATGT</b>                           | -352                  | 13.94199 |
|      | <i>tll1024 tll1025</i>         | --               |                 |                                                                  |                       |          |
| 6    | <i>tlr0592 tlr0593</i>         | --               | GTAgcaatagcTAC  | ATTATCTCTGATCGGCGAGCGAT <b>CGCCCAAG</b>                          | -79                   | 13.8677  |
| 7    | <i>tlr1468</i>                 | -                | GTAgttgagttTAC  | AACTGCATCGAATTGACAATGT <b>TAGGCTAAC</b>                          | -72                   | 13.82521 |
| 8    | <i>tll0590 tll0591</i>         | <i>aroE glnB</i> | GTAgtcatttgcTAC | ACGCTATACTCTTTTGCCAATGCT <b>TAAATAAA</b>                         | -65                   | 13.76371 |
| 9    | <i>tll1985</i>                 | <i>amt</i>       | GTAaacgtgaTAC   | AGATTTTCCAATCTGAGAAGCTGG <b>TGCAATCA</b>                         | -175                  | 13.61188 |
| 10   | <i>tlr1254</i>                 | -                | GTGtccaaaaaTAC  | AACGACTCTCGCTCAAATCGGT <b>TATGCTAGT</b>                          | -118                  | 13.51412 |
| 11   | <i>tlr0066</i>                 | -                | GTTtgccttctcTAC | AATATCAGGGTTACGCTC <b>TTTGCTGCTGCGA</b>                          | -77                   | 13.50423 |
| 12   | <i>tll2090 tll2091</i>         | --               | GTGaaгааacaTAC  | AAATTGAGAGCCCAACCAAGGTCT <b>TAAATTAA</b>                         | -89                   | 13.37053 |
| 13   | <i>tll2446 tll2447</i>         | --               | GTAatatccaaTAC  | TGAACTATTTTAAATTTTGGCC <b>TAGGGAGCT</b>                          | -175                  | 13.17517 |
| 14   | <i>tll1357 tll1358 tll1359</i> | -- <i>ntcB</i>   | GTAtcaatcaaCAC  | ACTTTACCATGGGAAGTTGCAT <b>TAGATTGAA</b>                          | -107                  | 13.16372 |
| 15   | <i>tll0306 tll0307</i>         | - <i>clpC</i>    | GTAaattggcaTAC  | AAAAACACGCCAAAGTGGACGTGT <b>TAAGATG</b>                          | -69                   | 13.1492  |
| 16   | <i>tll1975</i>                 | -                | GTAgagcagagGAC  | TGAAAATCCTCGTGTGCGCCAGT <b>TCAATTCTG</b>                         | -52                   | 13.02452 |
| 17   | <i>tll1659</i>                 | -                | GTAtagaaaaacTAC | ACATAAGCCCTGCTAATTAAT <b>TAAAATCTT</b>                           | -173                  | 12.97041 |
| 18   | <i>tlr1592 tlr1593 tlr1594</i> | -- <i>ycf53</i>  | GTTattatcgcTAC  | ATTTTGTCAATTTAAGACGTGAT <b>TAAAATTTA</b>                         | -175                  | 12.78389 |
|      | <i>tlr1595</i>                 | -                |                 |                                                                  |                       |          |
| 19   | <i>tll0830 tll0831</i>         | - <i>sigB</i>    | GTAgattaggaTAC  | AGGCTAACTCCCTCTCCCTGCT <b>TAGGCTAAC</b>                          | -195                  | 12.71235 |
| 20   | <i>tll2333 tll2334 tll2335</i> | - <i>pilin</i> - | GTAagtttggtTAC  | ACTGAAGGCAAGTGTGGAT <b>CAACTGGATAAG</b>                          | -309                  | 12.61023 |
|      | <i>tll2336</i>                 | -                |                 |                                                                  |                       |          |
| 21   | <i>tll1334</i>                 | -                | GTAgtcgtggaTAC  | ATTGTTGACTTTAATGATGAGCCTGT <b>TATCCA</b>                         | -267                  | 12.59979 |
| 22   | <i>tlr1660</i>                 | -                | GTAgttttctaTAC  | TATATTTAAGCAAACCCAACAAGAT <b>CAGCTC</b>                          | -162                  | 12.43139 |
| 23   | <i>tll0396 tll0397 tll0398</i> | ---              | GAAgtcccatTAC   | TGGTAACGTGGTATGGAAGCCA <b>TATGATGGC</b>                          | -65                   | 12.40654 |
| 24   | <i>tlr1050</i>                 | <i>isiA</i>      | GTTtctggaaaTAC  | AACGCCCTGGCCGTCAGT <b>TACATACTGTT</b>                            | -182                  | 12.36656 |
| 25   | <i>tll0312</i>                 | -                | GTAAttctattaTAC | GATTTTCCAATATTCATACGGT <b>TAAACGCCAG</b>                         | -70                   | 12.34701 |
| 26   | <i>tll1486 tll1487 tll1488</i> | ---              | GTAagtagcacAAC  | TATACTCGGCAGTCATAGACT <b>TGCCGCTCTTA</b>                         | -231                  | 12.34164 |
| 27   | <i>tlr0833</i>                 | <i>lrtA</i>      | GTAatccccgaTAC  | GAAGATGTTAGGGTGAAG <b>TAGATCAGCCTT</b>                           | -67                   | 12.33556 |
| 28   | <i>tlr1530 tsr1531</i>         | <i>psbB psbT</i> | GTAgtgaagtTAC   | GGGTAAATTGGCCGTTAAACTCT <b>TAGTAGGG</b>                          | -115                  | 12.29831 |
| 29   | <i>tll1048</i>                 | -                | GTAcaactgcgCAC  | CAGCACCGTTGACCGTCC <b>TAAATG</b>                                 | -25                   | 12.2856  |
| 30   | <i>tll0832</i>                 | -                | GTAatcggggatTAC | AGGGCATCCTGAGGCTCTTACCTT <b>TATTCG</b>                           | -80                   | 12.27722 |
| 31   | <i>tlr2380 tlr2381</i>         | <i>desC1</i> -   | GTAgtcgttaTAC   | TAAAGTCTGATAGGGCTGT <b>TCAAGCTCAGC</b>                           | -70                   | 12.17003 |
| 32   | <i>tll0616 tll0617</i>         | - <i>sigA</i>    | GTTagaaaggcTAC  | AATCAATGAGGTTTTAGT <b>TAAAATTA</b>                               | -198                  | 12.14681 |
| 33   | <i>tlr0782</i>                 | -                | GTAatttaatgTAC  | ATTTCAAAATCTGTATTAGCCT <b>TAGTTAA</b>                            | -66                   | 12.11459 |
| 34   | <i>tll0559</i>                 | -                | GTGtaaattgtTAC  | AAACCATTACGAGTGCAC <b>TAGACTGGGAA</b>                            | -58                   | 12.1118  |

<sup>1</sup> Bold, -10 like boxes.

Table s11, Zhengchang Su, et al

Table s11. Predicted NtcA promoters in WH8102

| Rank | Transcription unit                                                                        | Name                          | NtcA site      | Downstream of NtcA binding site<br>and -10 like box <sup>1</sup> | NtcA site<br>position | Score   |
|------|-------------------------------------------------------------------------------------------|-------------------------------|----------------|------------------------------------------------------------------|-----------------------|---------|
| 1    | <i>synw2442</i>                                                                           | <i>urtA</i>                   | GTTcCGgttgaTAC | CAAAGCGGTGGGGGCCCTTTT <b>TACCTTCC</b>                            | -52                   | 14.1879 |
| 2    | <i>synw1073</i>                                                                           | <i>glnA</i>                   | GTGcgcgttgaTAC | AAAACAGGGCATAACGGCTCCT <b>TACGGT</b> CGT                         | -60                   | 13.7574 |
| 3    | <i>synw2485 synw2486 synw2487</i>                                                         | <i>cynA cynB cynC</i>         | GTAtcacctgaTAC | AACATCCGCGTTCGCTTTCCA <b>ACTATAAAATA</b>                         | -51                   | 13.692  |
| 4    | <i>synw0165</i>                                                                           | -                             | GTAgtttaggaAAC | ATATGGGTAAAGATTTTTCGT <b>TATCAAGAG</b>                           | -39                   | 13.1547 |
| 5    | <i>synw1105</i>                                                                           | -                             | GTGttagttaaTAC | ACAAGCATGTACTAGACTGCGC <b>TAGTT</b> TAAT                         | -64                   | 13.1128 |
| 6    | <i>synw0153 synw0154</i>                                                                  | --                            | GTAgtcgcgcTAC  | ATCTGGTGGGGTGGG <b>CAGACCCGTCCTCCACC</b>                         | -62                   | 13.1126 |
| 7    | <i>synw0347</i>                                                                           | -                             | GTAgctaatttTAC | TCTAGCCTTGTTTTCTATATAGC <b>TAGCACTA</b>                          | -173                  | 13.0991 |
| 8    | <i>synw1434 synw1435</i>                                                                  | --                            | GTAacaacaccTAC | AGCCTGAACCAGTCCACTCGG <b>TAACACT</b> TATG                        | -143                  | 12.7911 |
| 9    | <i>synw2477</i>                                                                           | <i>nirA</i>                   | GTAattccatcAAC | AGAACA <b>ACTTTT</b> GAGTACGA <b>ACTAGAAA</b> AGG                | -349                  | 12.7111 |
| 10   | <i>synw0253</i>                                                                           | <i>amt1</i>                   | GTTcagtcggaTAC | ACCATCCGGCGTGACCAGCAGCTC <b>TGCACTC</b>                          | -37                   | 12.7063 |
| 11   | <i>synw1412 synw1413 synw1414</i><br><i>synw1415 synw1416 synw1417</i><br><i>synw1418</i> | - <i>hypA2 hypB</i><br>-<br>- | GTAgctgatcaCAC | CGCGCGTGCCACCGGTGCCCG <b>CAGACAGT</b> GGA                        | -69                   | 12.6782 |
| 12   | <i>synw2475 synw2476</i>                                                                  | <i>cobA</i> -                 | GTTgatggaatTAC | GATTC <b>CGCTCGTAT</b> TGCCGTCTG <b>TA</b> ACTCTT                | -199                  | 12.5851 |
| 13   | <i>synw1507 synw1508</i>                                                                  | --                            | GTAataaagacTGC | GGAATTAATATTTCCGGCA <b>ACTTATACCTT</b>                           | -111                  | 12.5376 |
| 14   | <i>synw0152</i>                                                                           | <i>mrc</i>                    | GTAgcggcgacTAC | CGATATCGGGCTCCTGACGGGGC <b>TGGCGGG</b>                           | -527                  | 12.4768 |
| 15   | <i>synw1422 synw1423 synw1424</i><br><i>synw1425 synw1426</i>                             | ---<br>--                     | GTCgtatttcgTAC | ATTTTTGTGGCCGACCGGAGC <b>CAGTCTTT</b>                            | -52                   | 12.4149 |
| 16   | <i>synw0462</i>                                                                           | <i>glnB</i>                   | GTTacaggggcTAC | CCACACCGCCACCATT <b>CACGTCATGCT</b> TAAT                         | -51                   | 12.2099 |
| 17   | <i>synw2171</i>                                                                           | -                             | GTcatggatacTAC | CCTTGCCACCTCTGTACACT <b>TTTCGGGT</b> AGC                         | -56                   | 12.1677 |

<sup>1</sup> Bold, -10 like boxes.

Figure s1, Zhengchang Su, et al

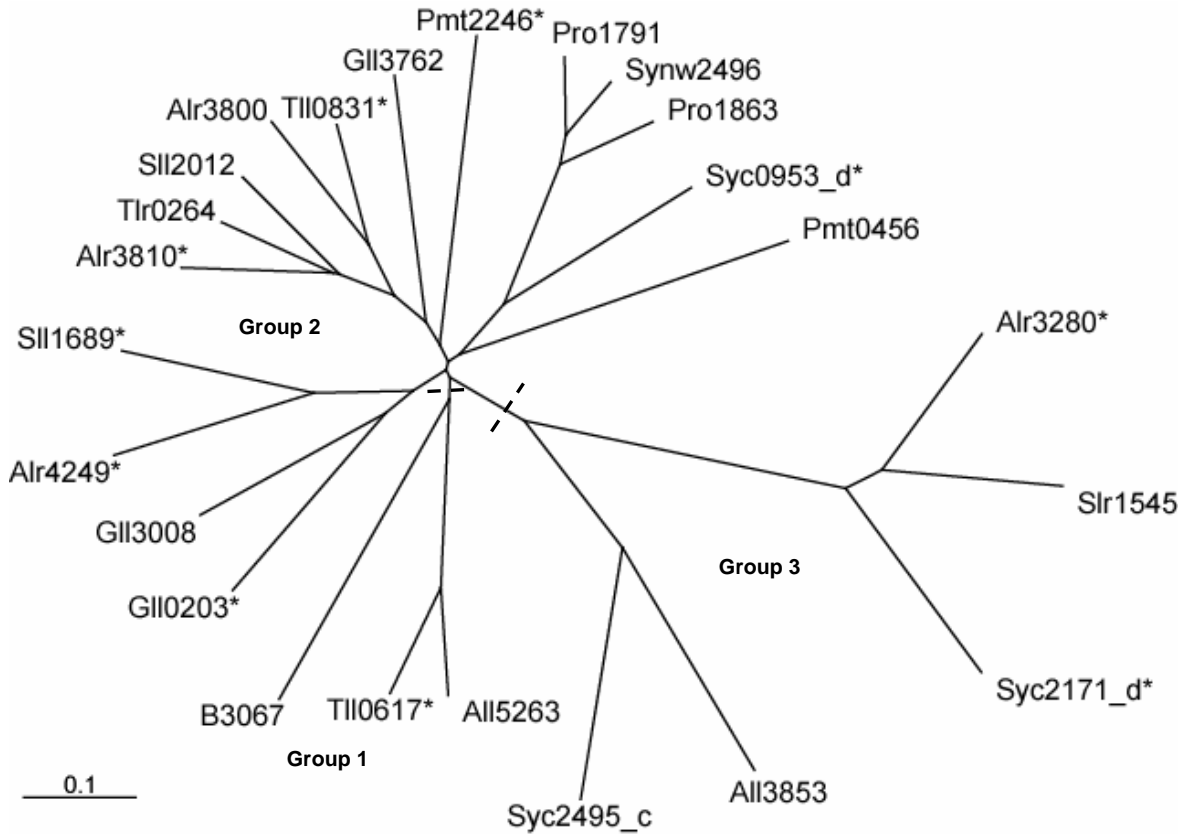

Figure s1. Phylogenetic relationships of the  $\sigma$ -factors bearing a putative NtcA promoter in their regulatory regions of the 9 genomes in our analyses. The unrooted tree was generated by the neighbor-joining method based on the multiple amino acid sequence alignments by the ClustalX program using the default settings. The  $\sigma^{70}$  of *E. coli* is included in this tree (B3067). The proteins are labeled by their synonyms. The dotted lines show the division of the groups. A star (\*) indicates that the putative promoter is identified at p-value < 0.01, otherwise at p-value < 0.05. The genomes that these proteins are from are as follows. CCMP1375: Pro1791 and Pro1863; PCC7421: GII0203, GII3762 and GII3008; MIT9313: Pmt2246 and Pmt0456; PCC7120, All4249, Alr3810, Alr3280, All3853, All3800 and All5263; PCC6301, Syc2171\_d, Syc2495\_c and Syc0953\_d; PCC6803, SII1689, SII2012 and Slr1545; thermosynechococcus: TII0831, TII0617 and Tlr0264; WH8102: Synw2496. Scale bar, substitutions per position.
